# Supplementary material for: Genome-wide diversity and selective pressure in the human rhinovirus
Source: PubMed Central journal article supplement (PMC1892812; doi:10.1186/1743-422x-4-40), 2007-05-03

**Table S4 - HRV serotypes used in this study for whole genome sequence analysis.**

**Table S5 - Genome assembly statistics.**

**Table S6 - PAML gene-specific codon model parameters.**

**Figure S9 - Location of most diversifying residues in HRV capsid genes assuming a homogeneous synonymous substitution rate.**

Top 5% diversifying residues within the HRV capsid genes mapped onto the viral pentamer structure computed by: A. codonml (Yang, 1997), and B. REL (non-synonymous), or assuming a variable synonymous substitution rate, C. REL (Dual), (Pond and Frost, 2005). (PDF)

TABLE S4. HRV serotypes used for whole genome sequence analysis

| HRV serotype | HRV subgroup | Source <sup>†</sup> | Identifier* | Isolation Date** |
|--------------|--------------|---------------------|-------------|------------------|
| HRV001b      | A            | CaDHS               | TC-72697    | 4/23/1973        |
| HRV001b      | A            | NCBI                | D00239      | NA               |
| HRV002       | A            | NCBI                | X02316      | NA               |
| HRV003       | B            | CaDHS               | TC-64701    | 10/24/1967       |
| HRV004       | B            | CaDHS               | NA          | 10/26/1967       |
| HRV006       | B            | CaDHS               | TC-65006    | 10/31/1967       |
| HRV007       | A            | CaDHS               | TC-65007    | 11/3/1967        |
| HRV010       | A            | CaDHS               | TC-71602    | 4/26/1971        |
| HRV014       | B            | NCBI                | K02121      | NA               |
| HRV015       | A            | CaDHS               | TC-66919    | 5/10/1968        |
| HRV016       | A            | NCBI                | L24917      | NA               |
| HRV023       | A            | CaDHS               | TC-65847    | 10/27/1967       |
| HRV028       | A            | CaDHS               | TC-65852    | 10/30/1967       |
| HRV030       | A            | CaDHS               | TC-67821    | 5/7/1969         |
| HRV034       | A            | CaDHS               | TC-65856    | 11/6/1967        |
| HRV035       | B            | CaDHS               | TC-73280    | 5/9/1972         |
| HRV036       | A            | CaDHS               | TC-74313    | 10/20/1973       |
| HRV038       | A            | CaDHS               | TC-72617    | 9/22/1972        |
| HRV039       | A            | NCBI                | AY651783    | NA               |
| HRV041       | A            | CaDHS               | TC-66066    | 6/7/1967         |
| HRV044       | A            | CaDHS               | TC-72548    | 5/12/1972        |
| HRV046       | A            | CaDHS               | TC-75908    | 3/3/1975         |
| HRV048       | B            | CaDHS               | TC-70326    | 11/16/1970       |
| HRV049       | A            | CaDHS               | TC-66958    | 7/8/1968         |
| HRV053       | A            | CaDHS               | TC-67618    | 7/26/1968        |
| HRV055       | A            | CaDHS               | TC-64522    | 9/7/1967         |
| HRV059       | A            | CaDHS               | TC-70403    | 12/7/1970        |
| HRV070       | B            | CaDHS               | TC-72589    | 7/25/1972        |
| HRV073       | A            | CaDHS               | TC-73172    | 3/31/1972        |
| HRV074       | A            | CaDHS               | TC-70882    | 11/8/1971        |
| HRV075       | A            | CaDHS               | TC-70308    | 10/26/1970       |
| HRV076       | A            | CaDHS               | TC-70326    | 11/13/1970       |
| HRV087       | ---          | CaDHS               | TC-70827    | 10/20/1971       |
| HRV087/HEV68 | ---          | NCBI                | AY426531    | NA               |
| HRV088       | A            | CaDHS               | TC-70782    | 8/27/1971        |
| HRV089       | A            | NCBI                | A10937      | NA               |
| HRVsc        | A            | CaDHS               | TC-4669     | 11/24/2003       |

<sup>†</sup>CaDHS=California Department of Health Services Viral and Rickettsial Disease Laboratory; NCBI=National Center for Biotechnology Information Database; \* CaDHS vial number or Genbank accession number; \*\*NA=not available.

TABLE S5. Genome Assembly Statistics

| Serotype       | Length      | #Reads     | Base Quality |             |           | Read Depth |           |           |
|----------------|-------------|------------|--------------|-------------|-----------|------------|-----------|-----------|
|                |             |            | Min          | Ave         | Max       | Min        | Ave       | Max       |
| HRV003         | 7208        | 368        | 23           | 88.2        | 90        | 1          | 31.2      | 83        |
| HRV004         | 7212        | 503        | 26           | 89.1        | 99        | 1          | 27.2      | 83        |
| HRV006         | 7215        | 198        | 12           | 79.8        | 99        | 1          | 13.6      | 60        |
| HRV007         | 7148        | 407        | 19           | 84.3        | 90        | 2          | 32.9      | 162       |
| HRV010         | 7137        | 210        | 24           | 87.9        | 90        | 2          | 17.1      | 44        |
| HRV015         | 7134        | 223        | 30           | 84.5        | 90        | 1          | 16.5      | 79        |
| HRV023         | 7025        | 301        | 10           | 86.3        | 90        | 1          | 23.2      | 125       |
| HRV028         | 7148        | 333        | 11           | 86.6        | 99        | 2          | 28.7      | 94        |
| HRV030         | 7015        | 319        | 12           | 82.9        | 90        | 1          | 23.3      | 138       |
| HRV034         | 7119        | 287        | 20           | 82.5        | 90        | 2          | 19.3      | 45        |
| HRV035         | 7225        | 221        | 13           | 85.5        | 90        | 1          | 15.6      | 57        |
| HRV036         | 7140        | 345        | 36           | 87.3        | 98        | 2          | 22.9      | 97        |
| HRV038         | 7136        | 313        | 44           | 88.4        | 90        | 1          | 21.8      | 74        |
| HRV041         | 7145        | 332        | 11           | 89.1        | 90        | 2          | 23.8      | 87        |
| HRV044         | 7123        | 296        | 9            | 88.3        | 99        | 1          | 22.5      | 75        |
| HRV046         | 7149        | 320        | 11           | 80.6        | 90        | 1          | 24.2      | 169       |
| HRV048         | 7214        | 206        | 15           | 88.6        | 90        | 2          | 15.8      | 62        |
| HRV049         | 7106        | 252        | 59           | 89.3        | 90        | 3          | 21.0      | 66        |
| HRV053         | 7143        | 288        | 15           | 89.2        | 99        | 1          | 20.5      | 64        |
| HRV055         | 6957        | 211        | 56           | 89.8        | 90        | 1          | 18.2      | 48        |
| HRV059         | 7135        | 354        | 11           | 87.4        | 90        | 1          | 27.2      | 90        |
| HRV070         | 7223        | 606        | 12           | 88.3        | 90        | 1          | 46.0      | 132       |
| HRV073         | 7140        | 297        | 26           | 89.3        | 90        | 1          | 21.7      | 62        |
| HRV074         | 7120        | 325        | 14           | 88.9        | 90        | 1          | 28.4      | 88        |
| HRV075         | 7100        | 257        | 73           | 89.8        | 99        | 2          | 21.6      | 42        |
| HRV076         | 7129        | 317        | 20           | 85.1        | 99        | 1          | 21.4      | 194       |
| HRV087         | 7320        | 146        | 15           | 77.8        | 90        | 1          | 9.4       | 32        |
| HRV088         | 7143        | 321        | 17           | 82.8        | 90        | 2          | 22.5      | 130       |
| HRVsc          | 6967        | 275        | 12           | 88.5        | 99        | 1          | 16.8      | 47        |
| <b>Average</b> | <b>7150</b> | <b>304</b> | <b>22</b>    | <b>86.4</b> | <b>93</b> | <b>1</b>   | <b>22</b> | <b>87</b> |

TABLE S6. PAML gene-specific codon model parameters

| Gene | S* | M1        | M2        |               | M7         | M8        |           |               | 2 x $\Delta\ln L$ |       |       |
|------|----|-----------|-----------|---------------|------------|-----------|-----------|---------------|-------------------|-------|-------|
|      |    | $\ln L$   | $\ln L$   | $p(\omega_2)$ | $\omega_2$ | $\ln L$   | $\ln L$   | $p(\omega_1)$ | $\omega_1$        | M2-M1 | M8-M7 |
| VP4  | A  | -2014.06  | -2014.06  | 0.00          | 7.47       | -1971.20  | -1971.20  | 0.00          | 2.62              | 0.00  | 0.00  |
| VP4  | B  | -766.72   | -766.73   | 0.00          | 1.00       | -764.08   | -764.08   | 0.00          | 2.14              | 0.00  | 0.00  |
| VP2  | A  | -10922.94 | -10922.94 | 0.01          | 1.00       | -10635.94 | -10635.94 | 0.00          | 4.47              | 0.00  | 0.00  |
| VP2  | B  | -3681.33  | -3681.33  | 0.00          | 36.30      | -3621.05  | -3621.05  | 0.00          | 8.06              | 0.00  | 0.00  |
| VP3  | A  | -10956.49 | -10956.49 | 0.00          | 25.88      | -10644.99 | -10644.99 | 0.00          | 3.00              | 0.00  | 0.00  |
| VP3  | B  | -3312.49  | -3312.49  | 0.00          | 25.41      | -3268.67  | -3268.67  | 0.00          | 26.76             | 0.00  | 0.00  |
| VP1  | A  | -13303.40 | -13303.40 | 0.00          | 36.24      | -12806.15 | -12803.09 | 0.01          | 1.00              | 0.00  | 6.12  |
| VP1  | B  | -4230.79  | -4230.79  | 0.00          | 1.00       | -4180.79  | -4177.18  | 0.02          | 53.36             | 0.00  | 7.22  |
| P2A  | A  | -4814.03  | -4814.03  | 0.00          | 11.53      | -4733.04  | -4733.04  | 0.00          | 1.00              | 0.00  | 0.00  |
| P2A  | B  | -1986.47  | -1986.47  | 0.00          | 27.01      | -1955.31  | -1955.31  | 0.00          | 1.00              | 0.00  | 0.00  |
| P2B  | A  | -3460.73  | -3460.73  | 0.00          | 1.00       | -3402.27  | -3402.27  | 0.00          | 2.99              | 0.00  | 0.00  |
| P2B  | B  | -1248.17  | -1248.17  | 0.00          | 1.00       | -1237.68  | -1237.68  | 0.00          | 1.00              | 0.00  | 0.00  |
| P2C  | A  | -12247.46 | -12247.46 | 0.00          | 48.54      | -11906.17 | -11906.17 | 0.00          | 2.97              | 0.00  | 0.00  |
| P2C  | B  | -4149.52  | -4149.52  | 0.00          | 35.74      | -4104.74  | -4104.74  | 0.00          | 52.56             | 0.00  | 0.00  |
| P3A  | A  | -3011.64  | -3011.64  | 0.00          | 6.85       | -2941.04  | -2941.04  | 0.00          | 2.85              | 0.00  | 0.00  |
| P3A  | B  | -1022.07  | -1022.07  | 0.00          | 5.51       | -1009.81  | -1009.81  | 0.00          | 10.24             | 0.00  | 0.00  |
| Vpg  | A  | -763.87   | -763.87   | 0.00          | 3.21       | -748.90   | -748.90   | 0.00          | 3.20              | 0.00  | 0.00  |
| Vpg  | B  | -325.54   | -325.54   | 0.03          | 1.00       | -322.27   | -322.27   | 0.00          | 2.18              | 0.00  | 0.00  |
| P3C  | A  | -7093.92  | -7093.92  | 0.00          | 30.69      | -6871.20  | -6871.20  | 0.00          | 2.39              | 0.00  | 0.00  |
| P3C  | B  | -2503.73  | -2503.73  | 0.03          | 1.00       | -2465.49  | -2465.49  | 0.00          | 6.75              | 0.00  | 0.00  |
| Pol  | A  | -18753.77 | -18753.77 | 0.00          | 33.41      | -18093.48 | -18093.48 | 0.00          | 5.91              | 0.00  | 0.00  |
| Pol  | B  | -6293.96  | -6293.96  | 0.00          | 1.00       | -6196.52  | -6194.36  | 0.01          | 1.82              | 0.00  | 4.32  |

\*S=serotype of HRV data set

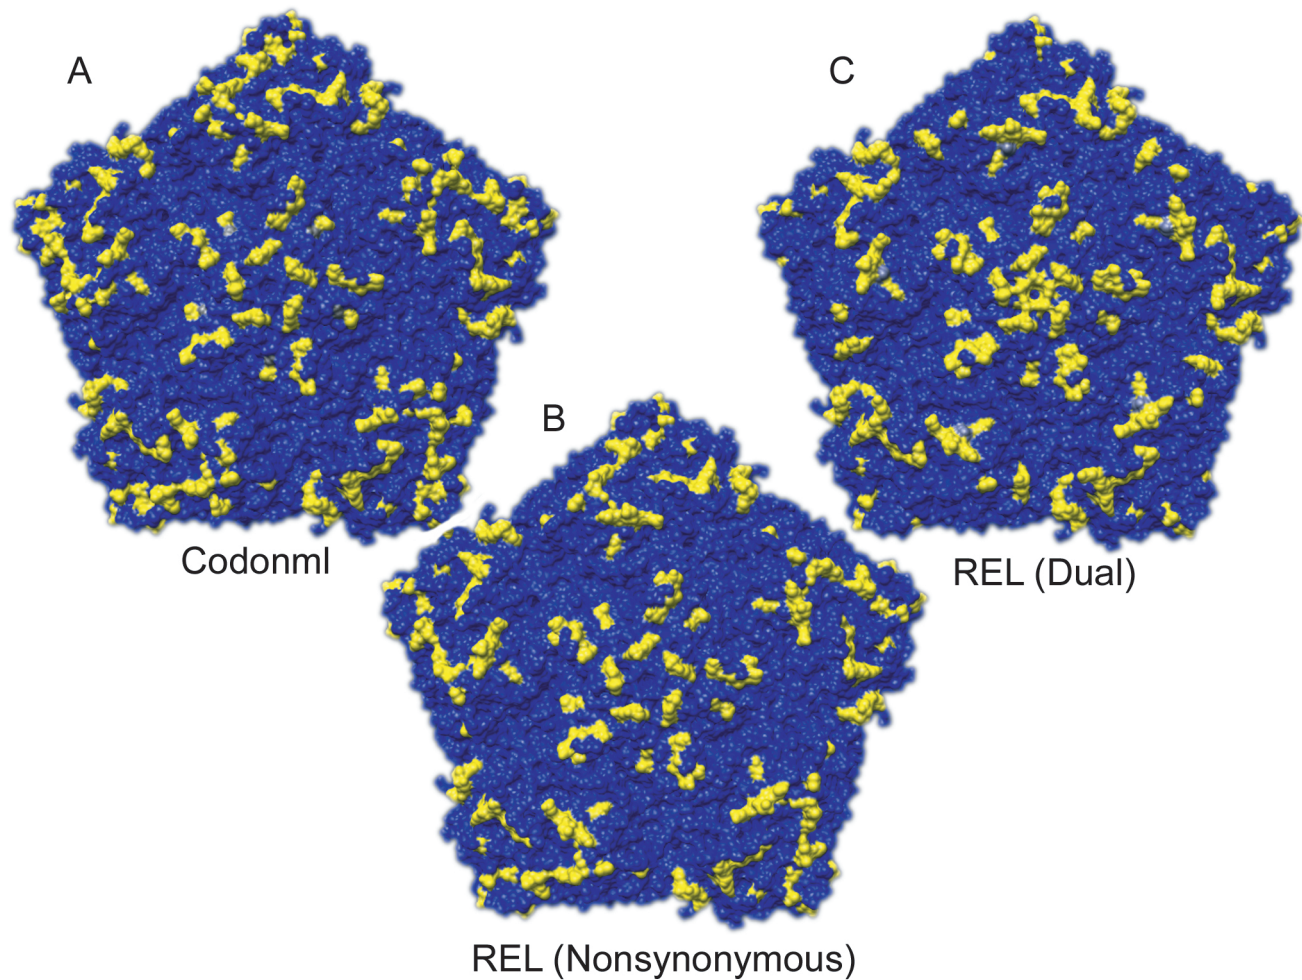

Supplement: 1743-422X-4-40-S5.pdf [file 1743-422X-4-40-S5.pdf]
