# Supplementary material for: Genome-wide diversity and selective pressure in the human rhinovirus
Source: PubMed Central journal article supplement (PMC1892812; doi:10.1186/1743-422x-4-40), 2007-05-03
Supplement: 1743-422X-4-40-S1.pdf [file 1743-422X-4-40-S1.pdf]

**Figure S1 - HRV phylogenetic tree based on aligned VP1 sequences available in the NCBI database.**

Neighbor-joining phylogenetic trees based on nucleotide sequences of HRVA (red) and HRVB (blue). Bold text with \* adjacent indicates the 6 HRV serotypes with full genome sequence publicly available at the outset of this study. Bold text without star indicates the 27 additional characterized HRV serotypes for which complete genome sequence was obtained in this study. (PDF)

**Figure S2 – VP1 dN/dS values computed for all 102 HRV serotypes versus the 34 fully sequenced serotypes.**

Scatter plot comparing dN/dS values for each residue in the VP1 gene calculated from all 102 serotypes (x axis) and values calculated from the 34 complete genome sequences (y axis) analyzed. Values calculated from subgroup A sequences in red, values from subgroup B sequences in blue. Spearman rank correlation coefficient values for each dataset are shown. (PDF)

**Figure S3 - HRV genomic phylogenetic tree based on deduced amino acid sequences of available HRV genomes.**

Neighbor-joining phylogenetic trees based on nucleotide sequences of HRVA (red) and HRVB (blue). Bootstrap values for each node are shown according to color scale indicated in figure. (PDF)

**Data S1 - HRV sub-genomic phylogenetic trees based on nucleotide sequence of each locus for available HRV genomes.**

Neighbor-joining phylogenetic trees based on nucleotide sequences of the 5'NCR and each gene within the HRV genome. Bootstrap values are indicated at each node. (PDF)

**Data S2 –HRV sub-genomic phylogenetic trees based on deduced amino acid sequence of available HRV genomes.**

Neighbor-joining phylogenetic trees based on deduced amino acid sequences of each gene within the HRV genome. Bootstrap values are indicated at each node. (PDF)

Fig. S1

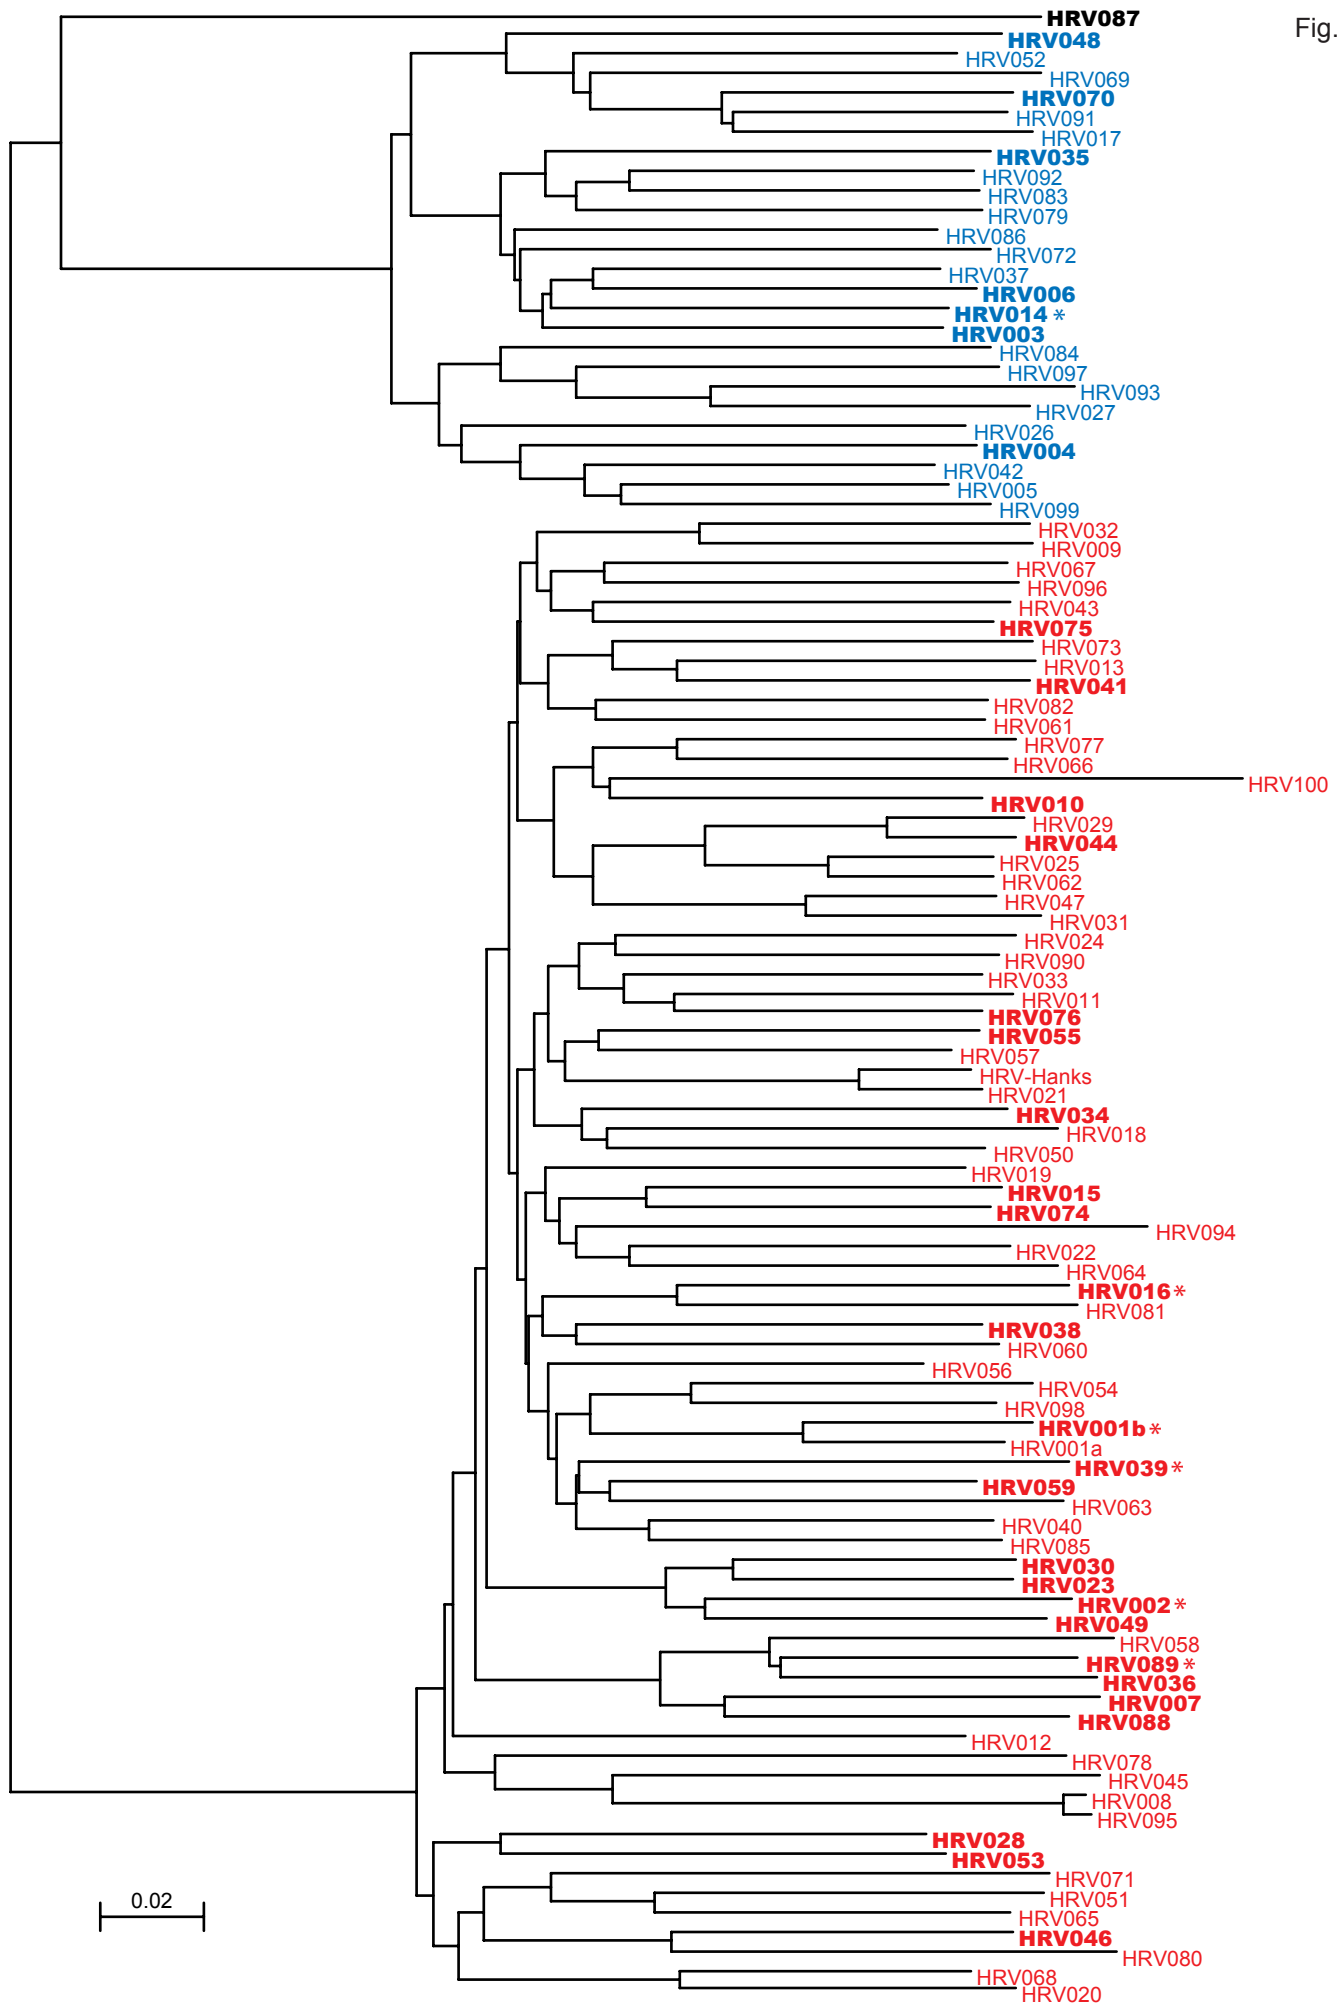

Fig.S2

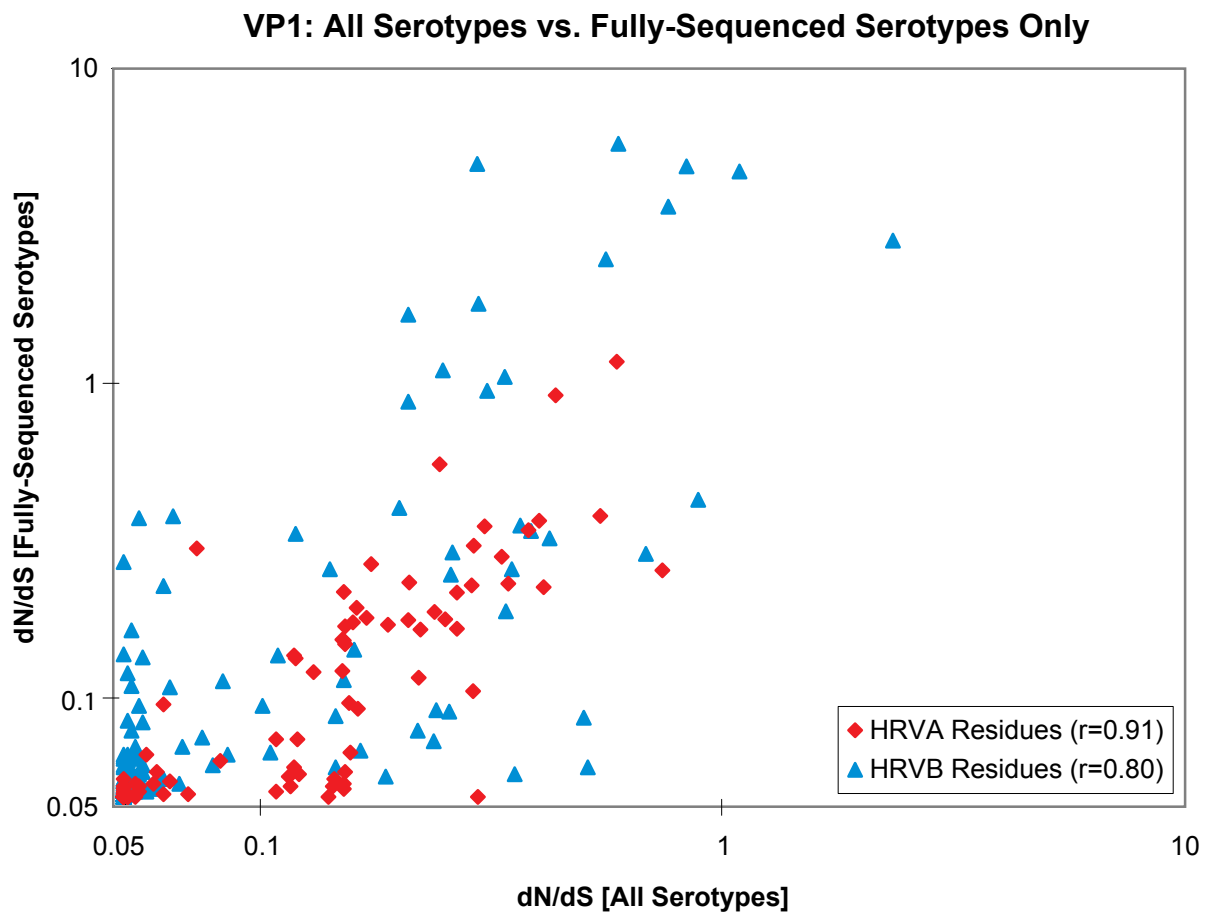

Fig. S3

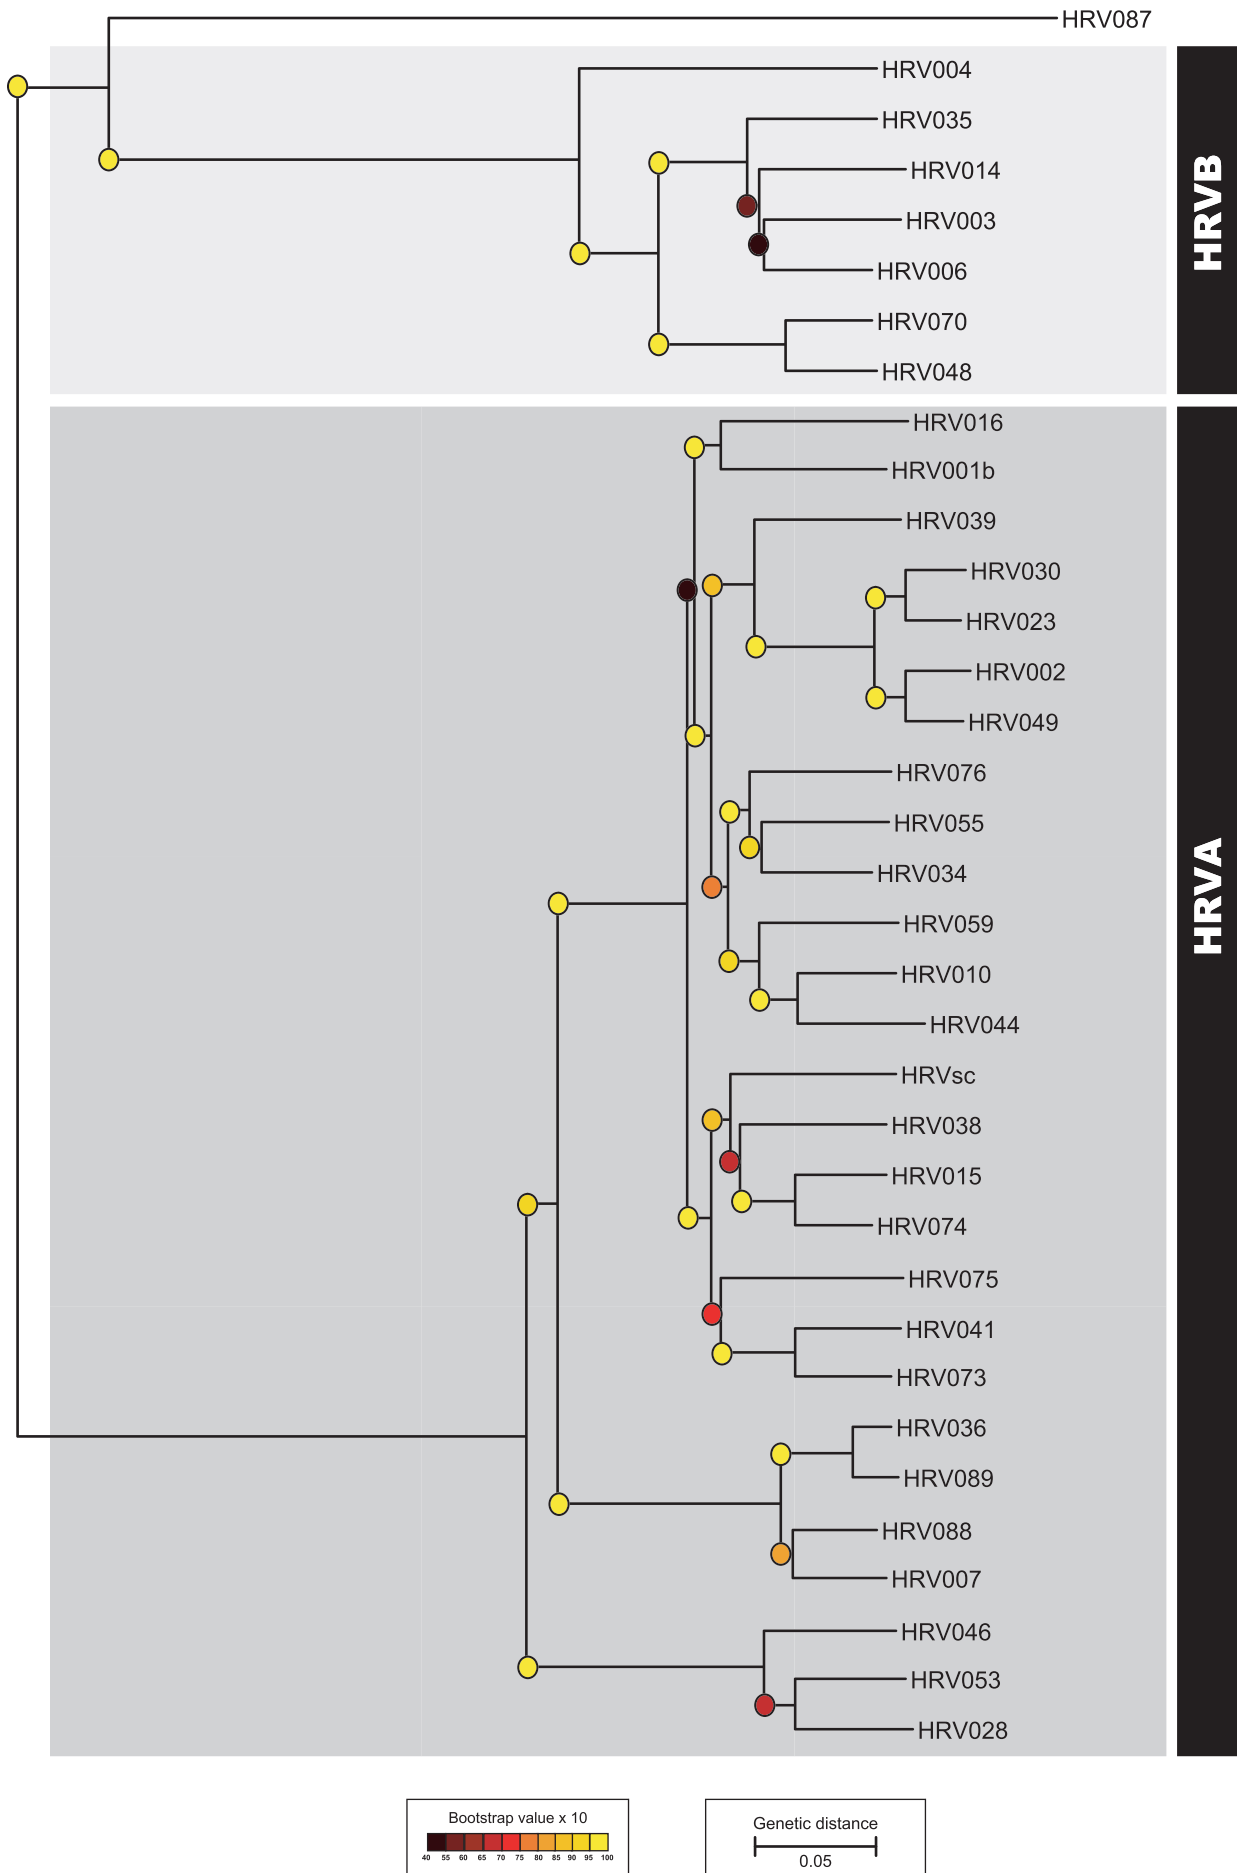

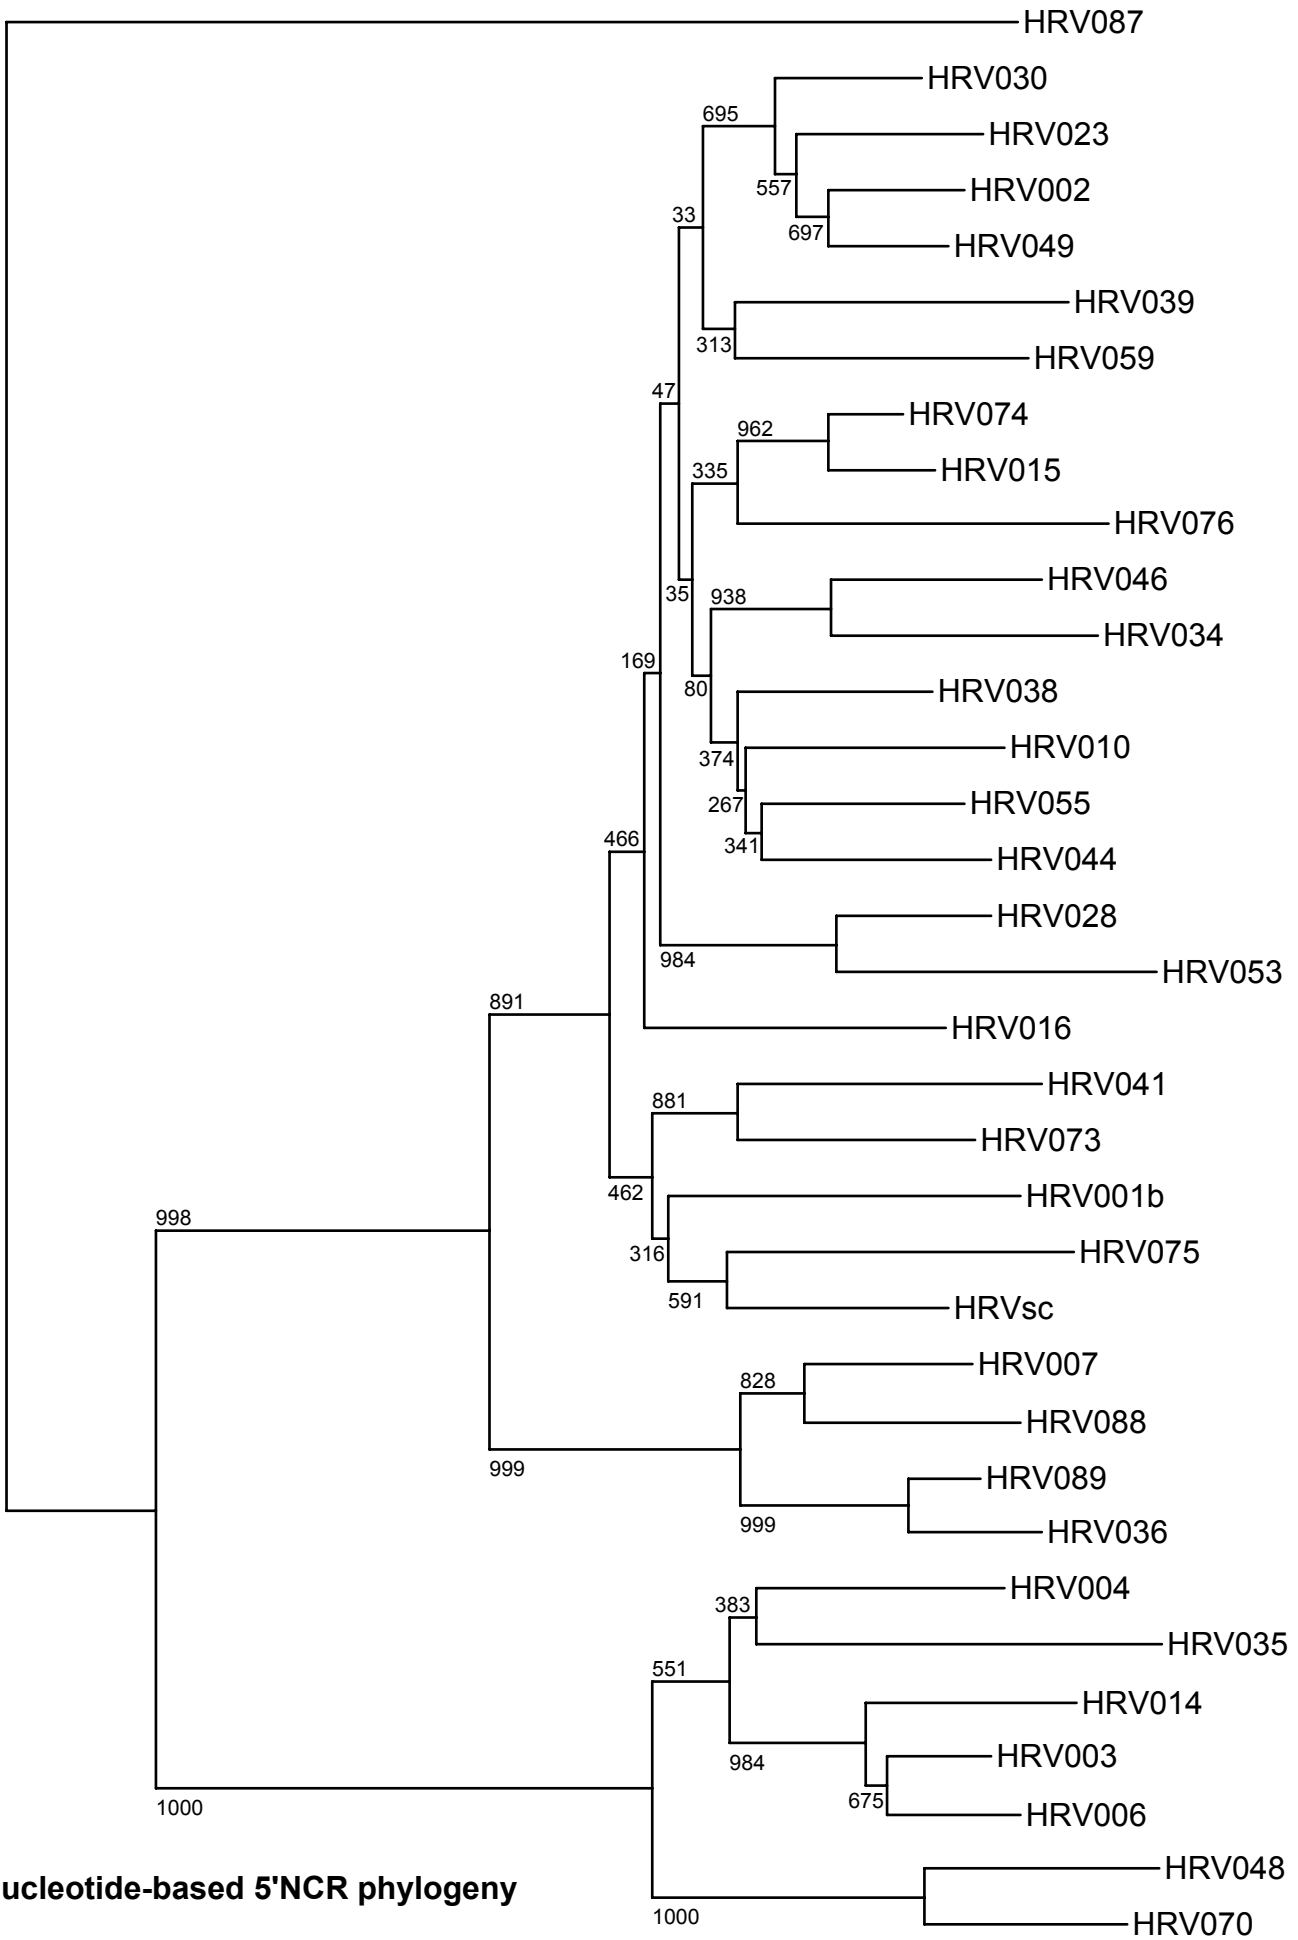

0.05

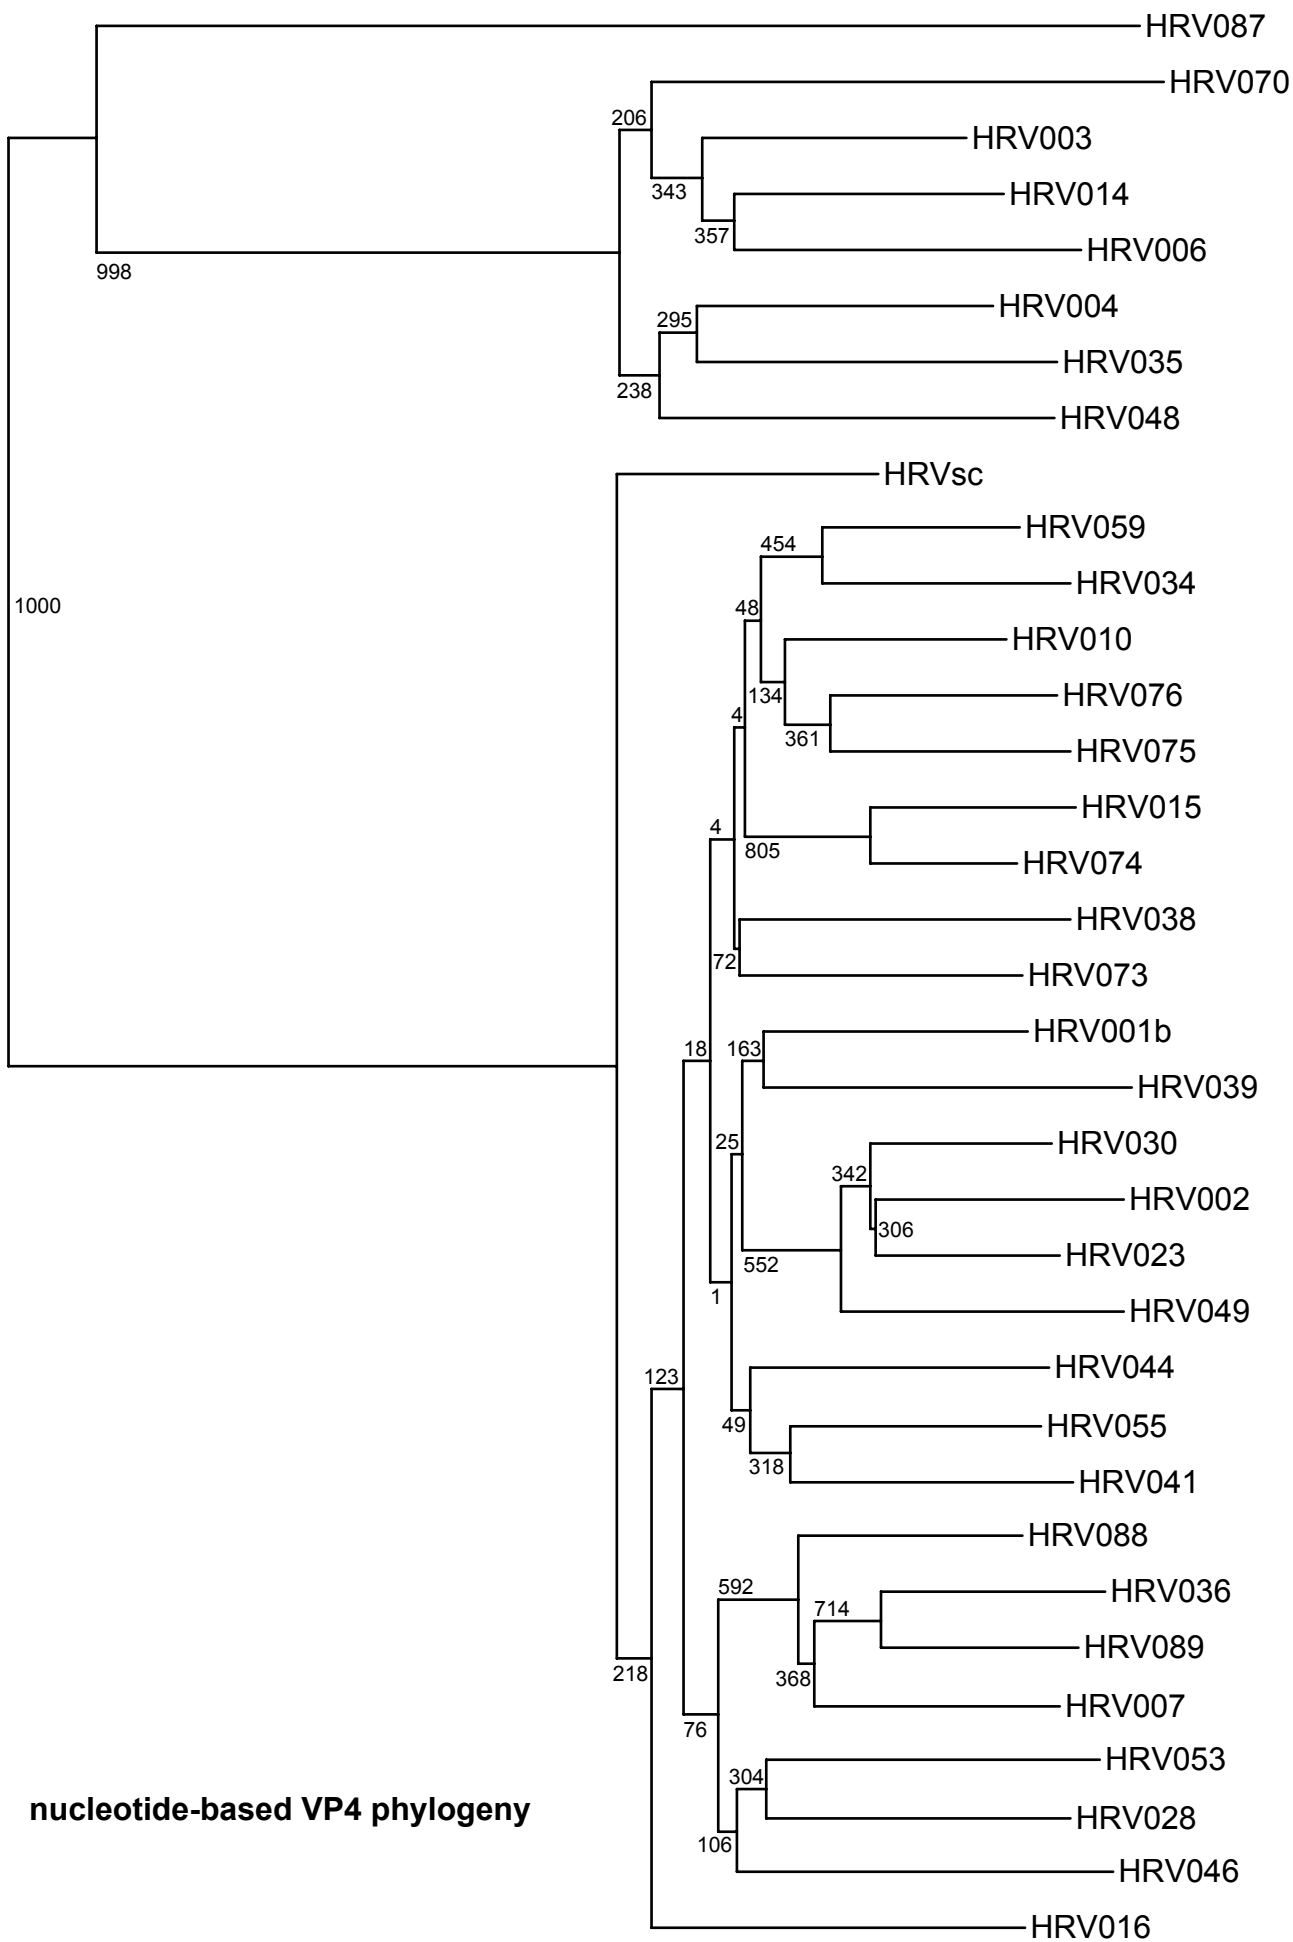

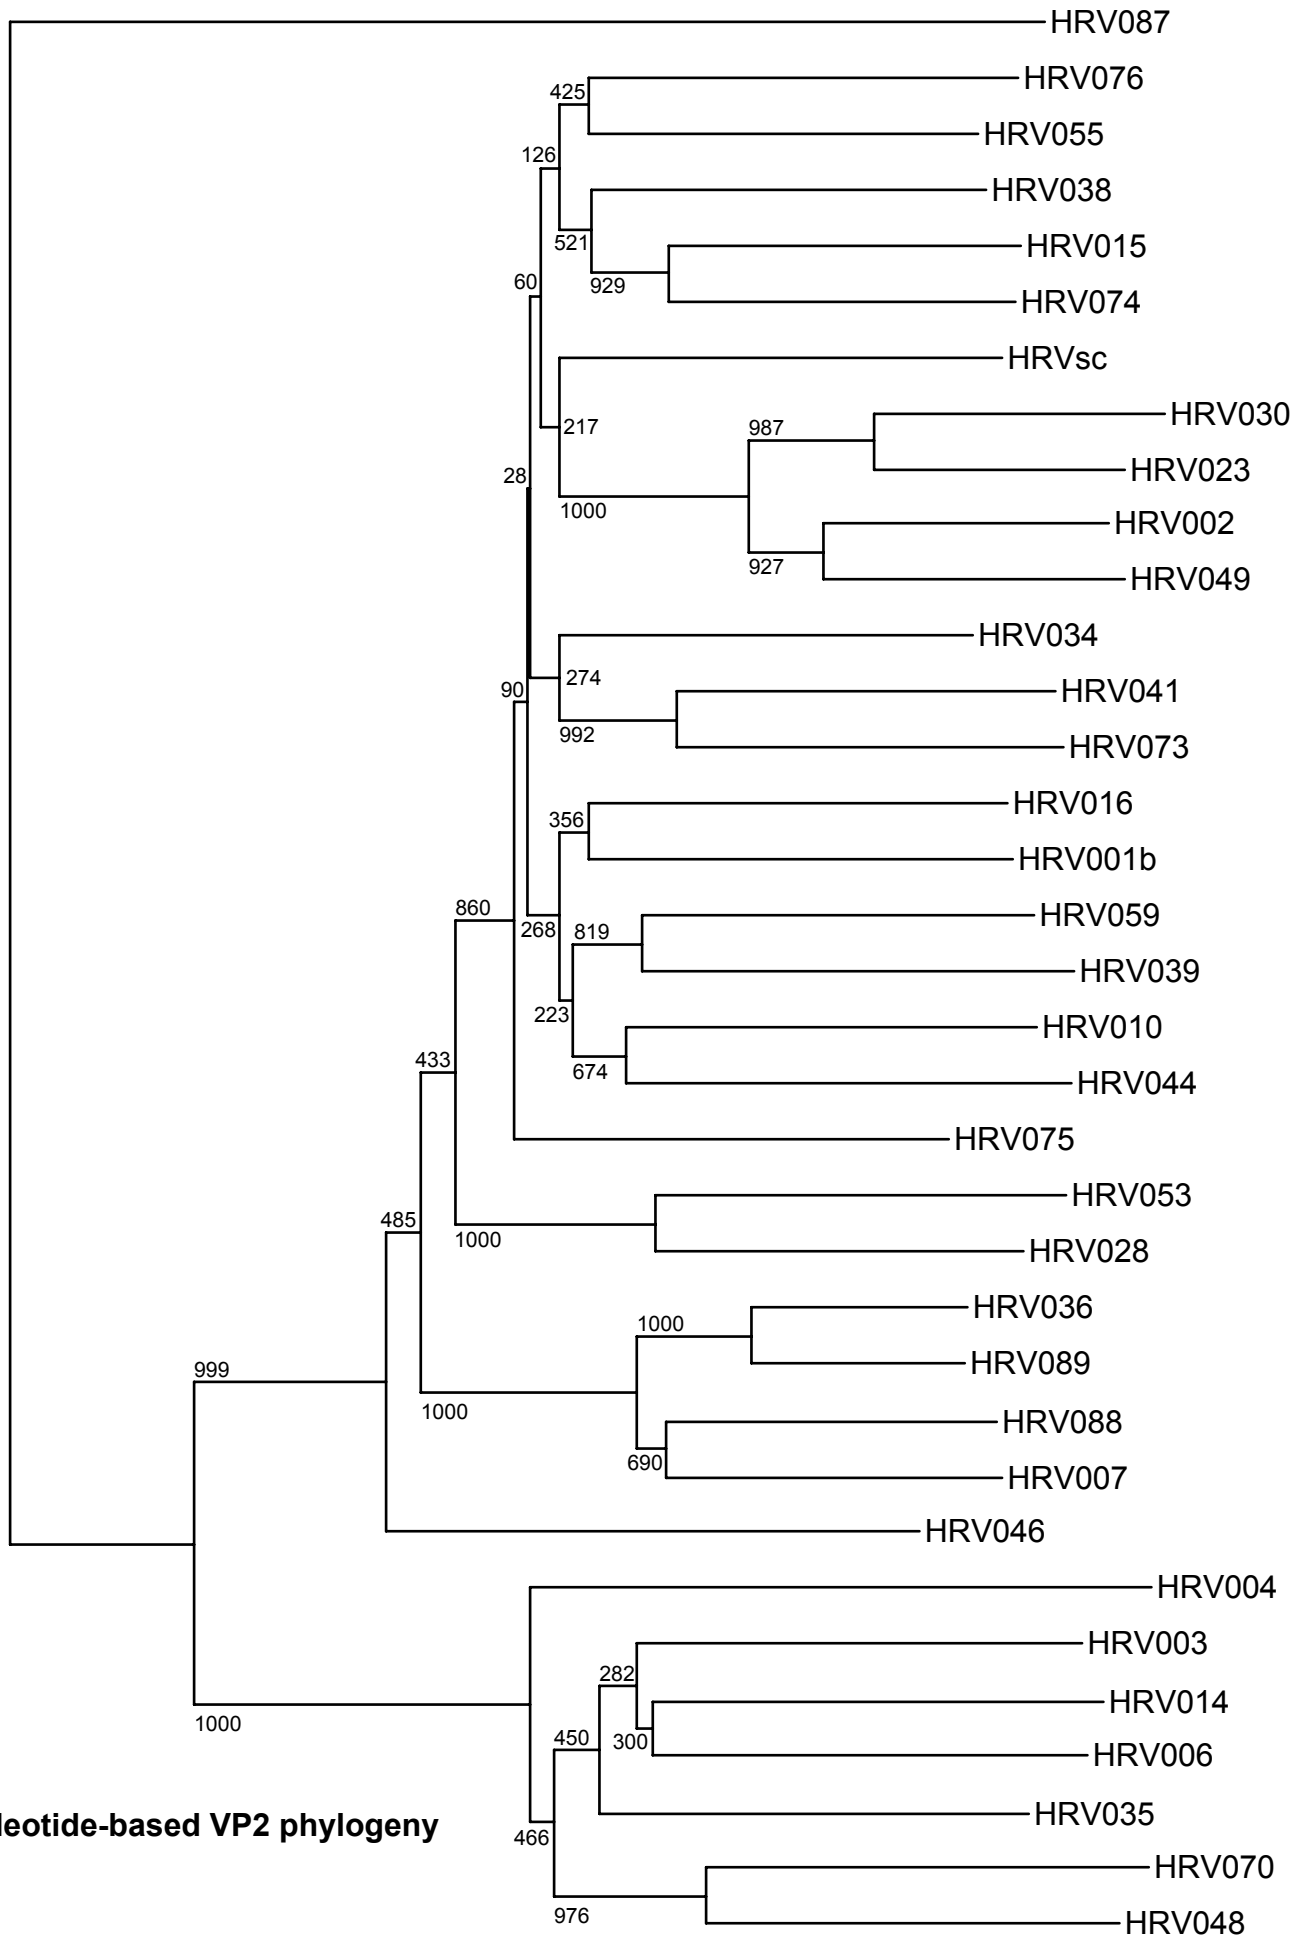

nucleotide-based VP2 phylogeny



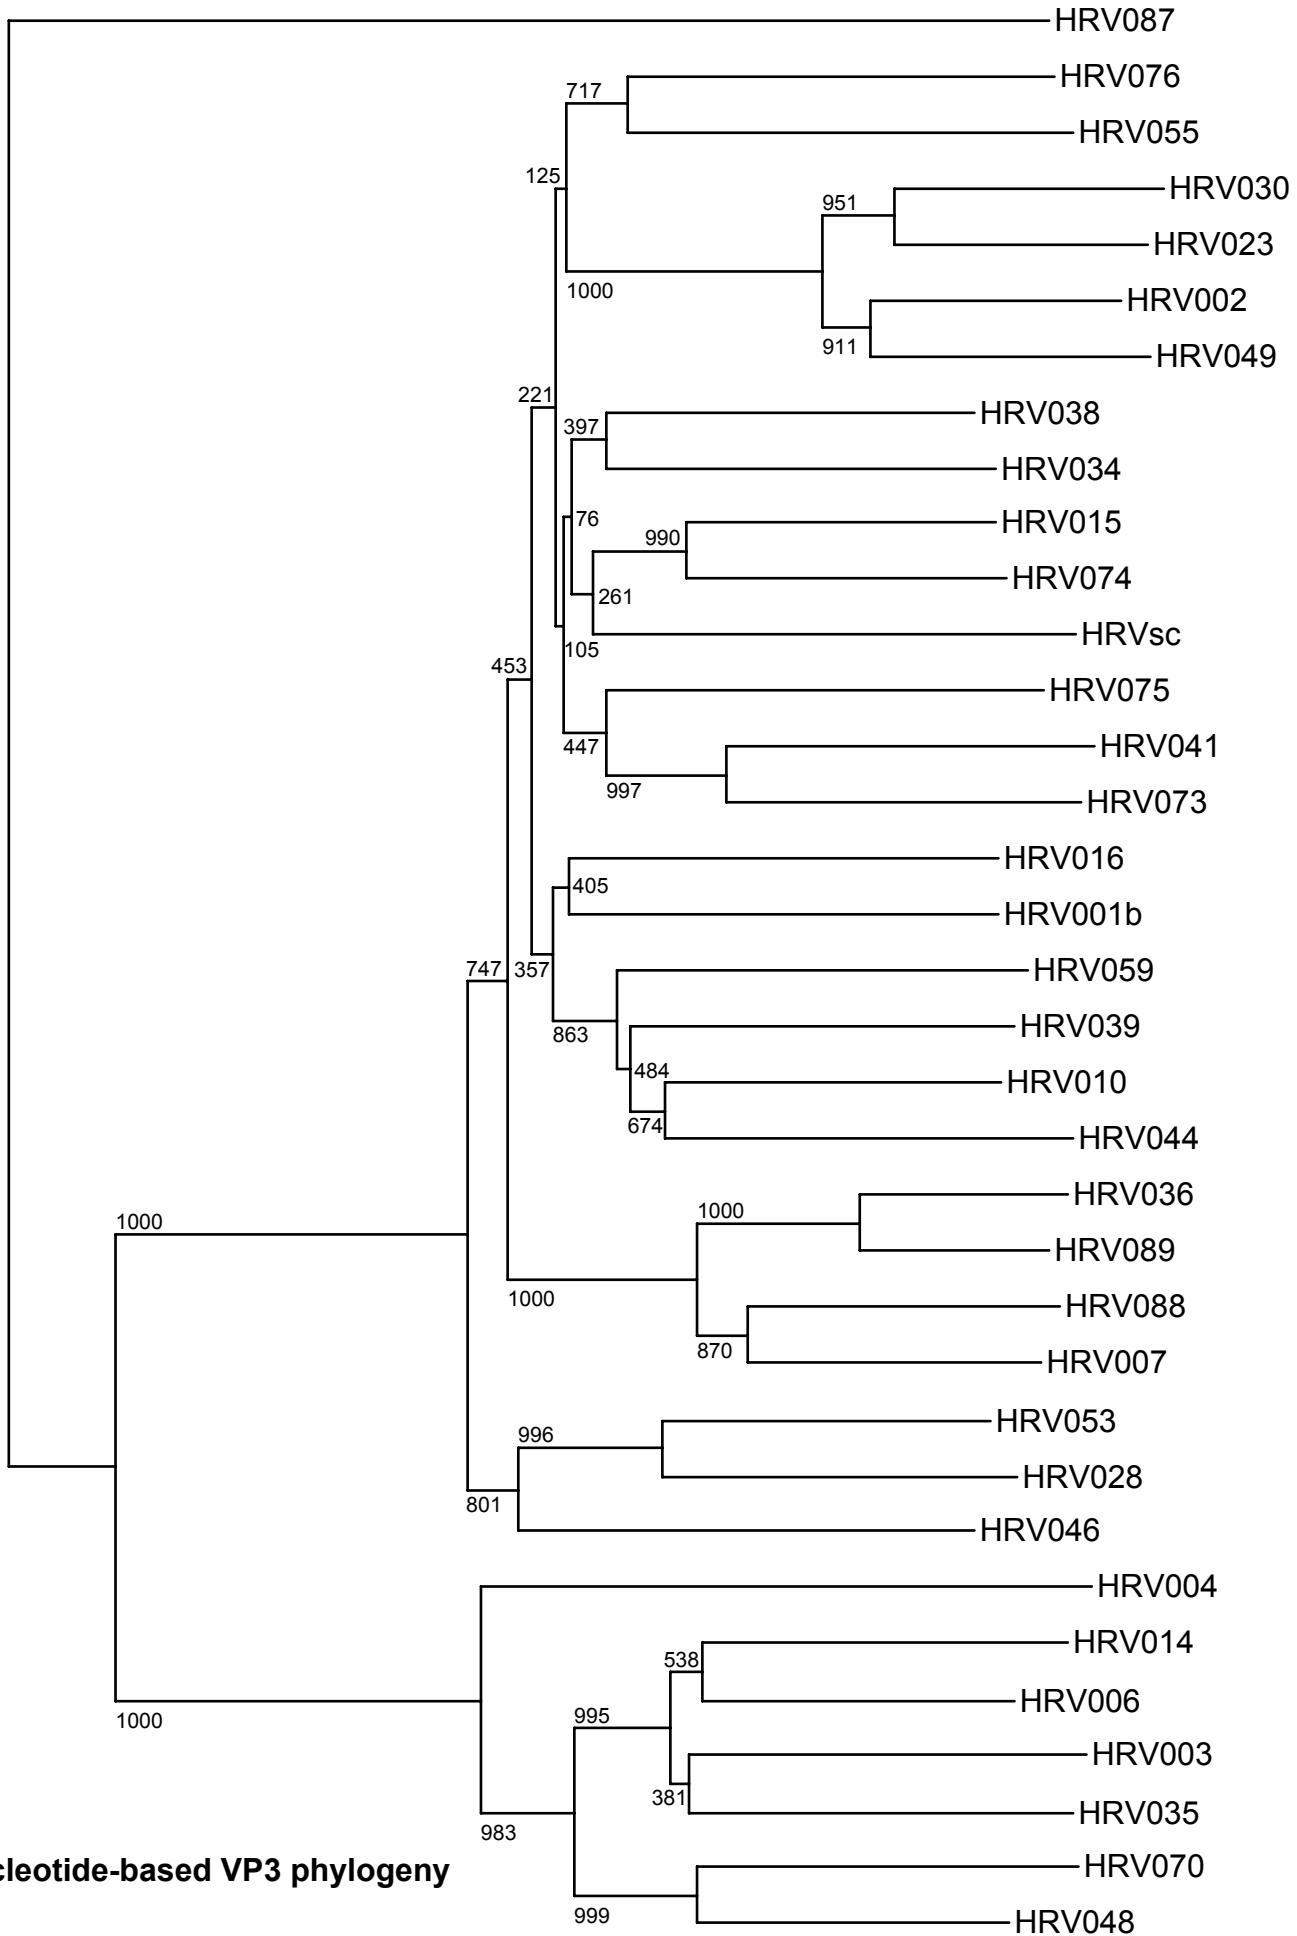

nucleotide-based VP3 phylogeny

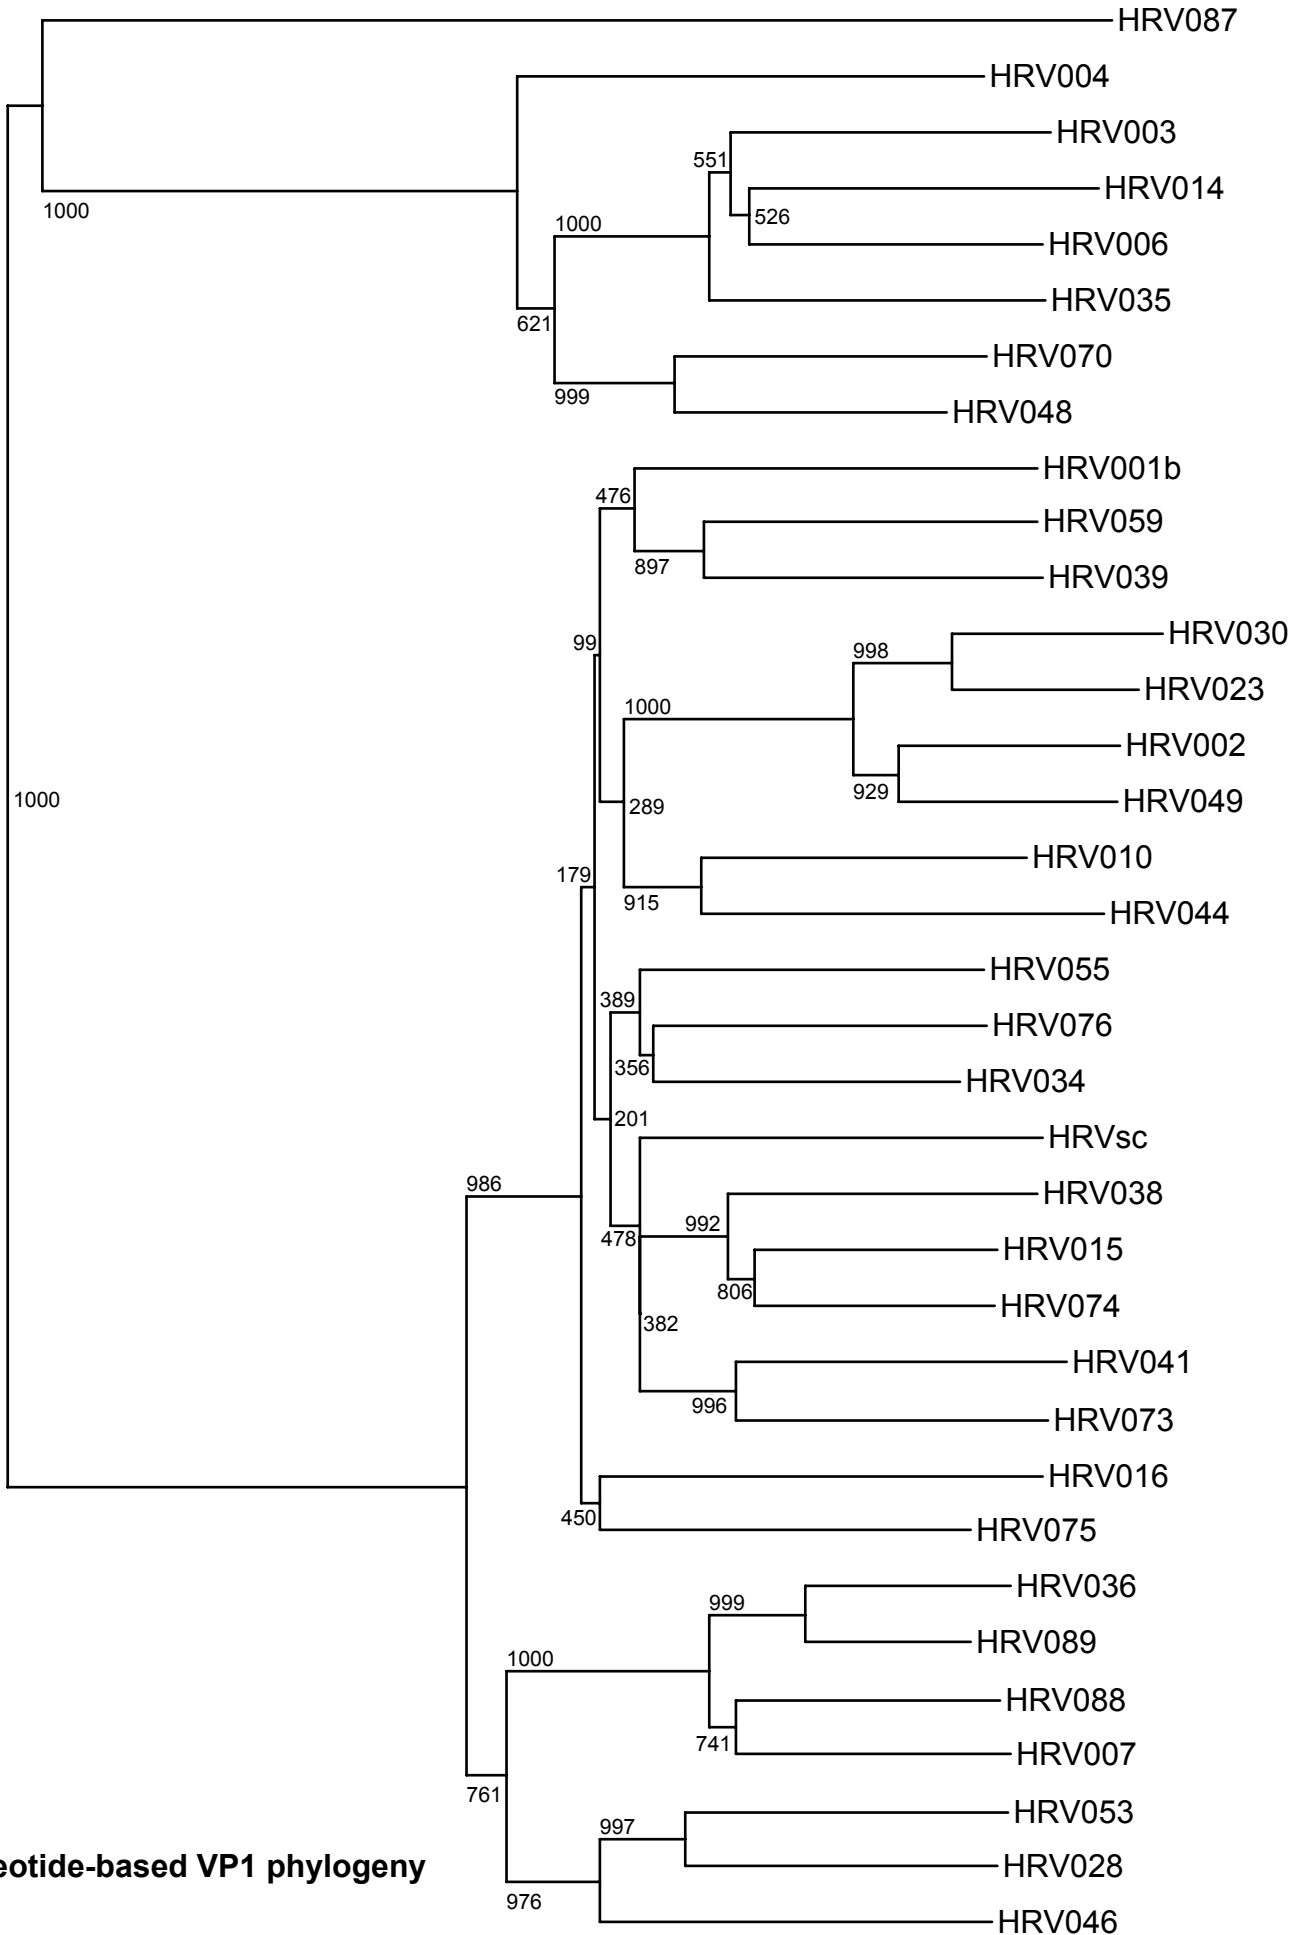

nucleotide-based VP1 phylogeny

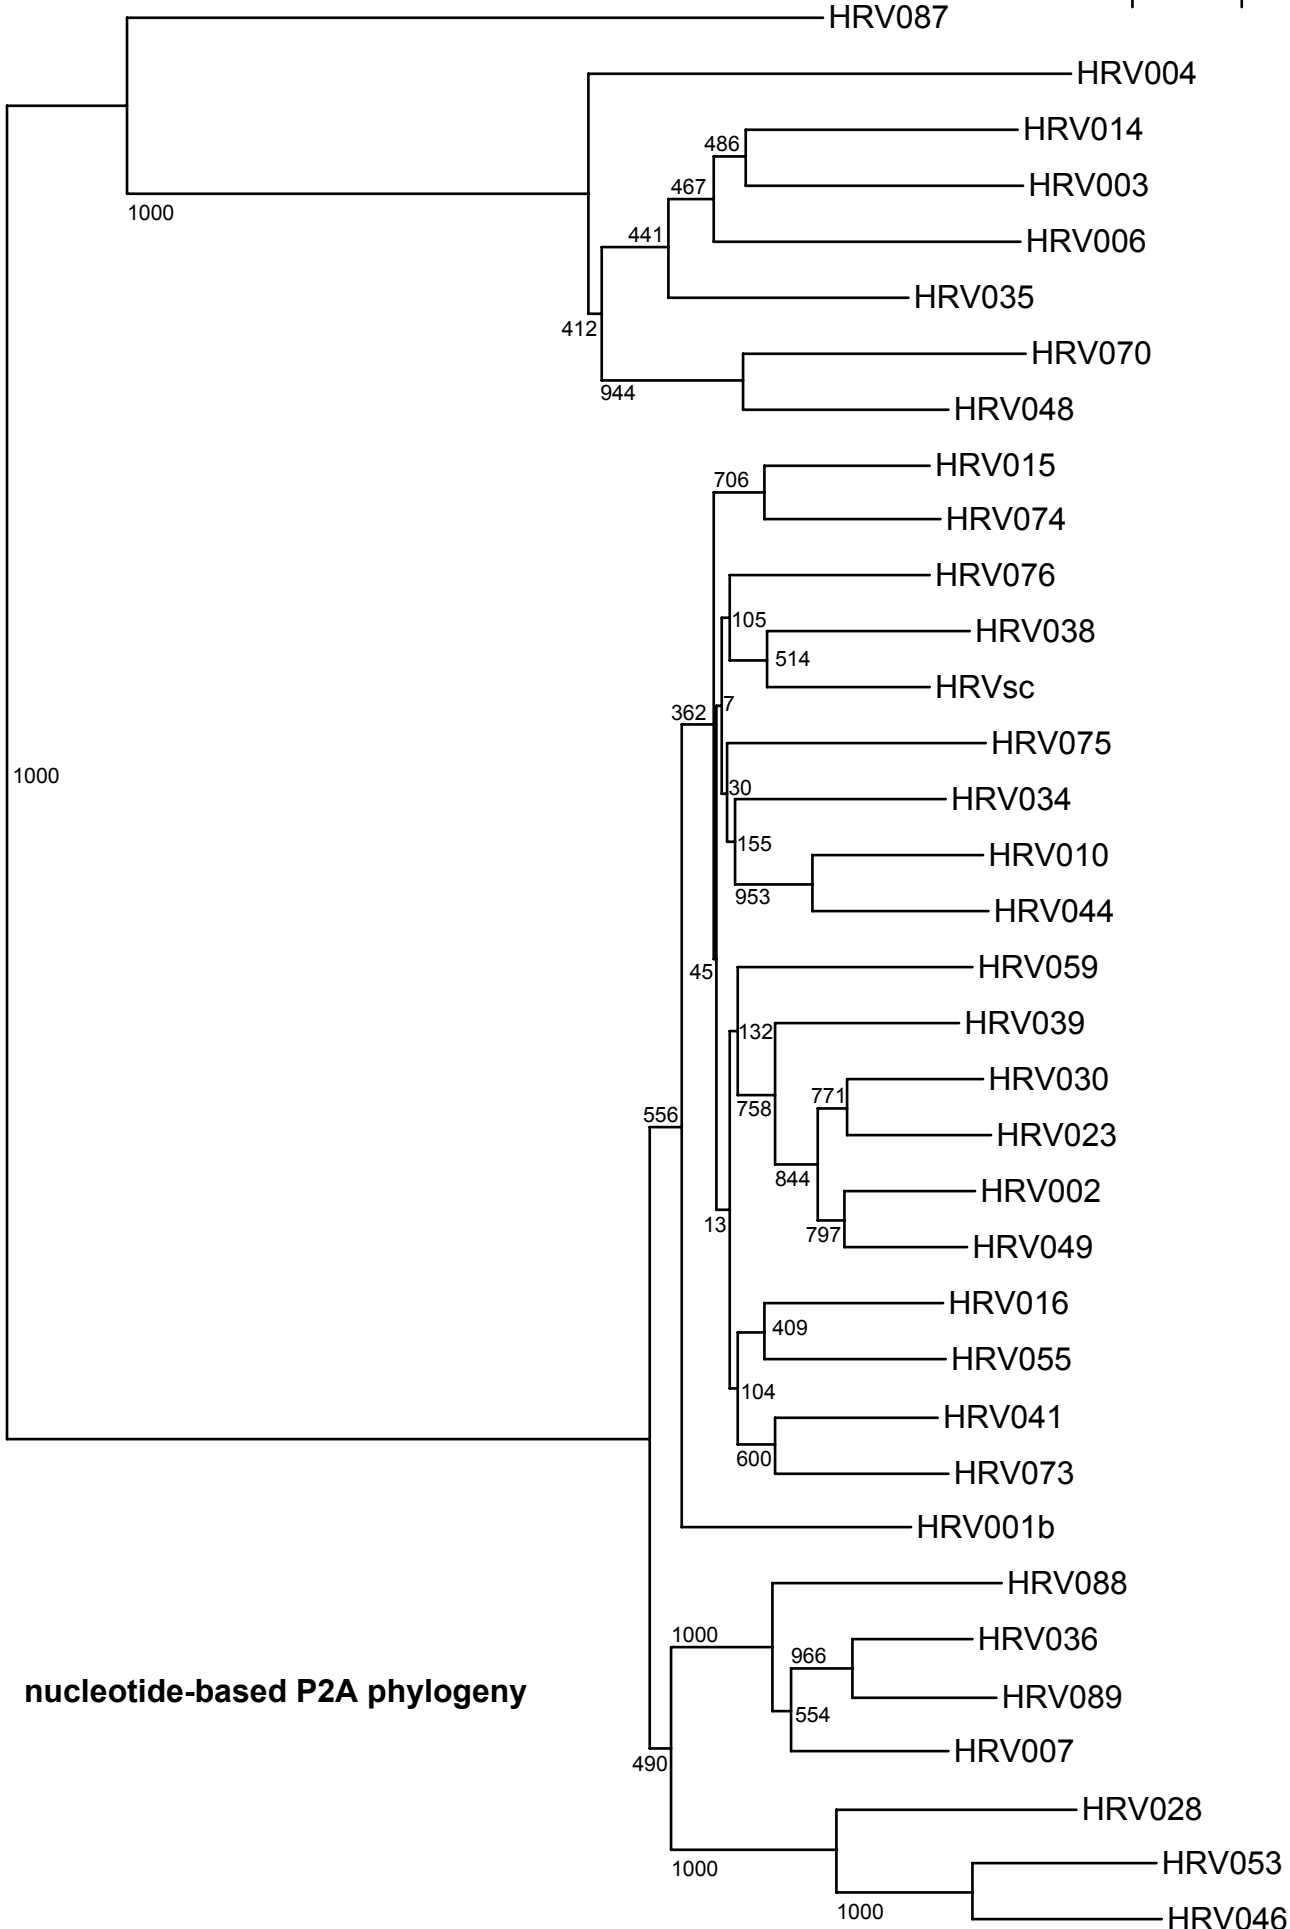

Data S1

0.05

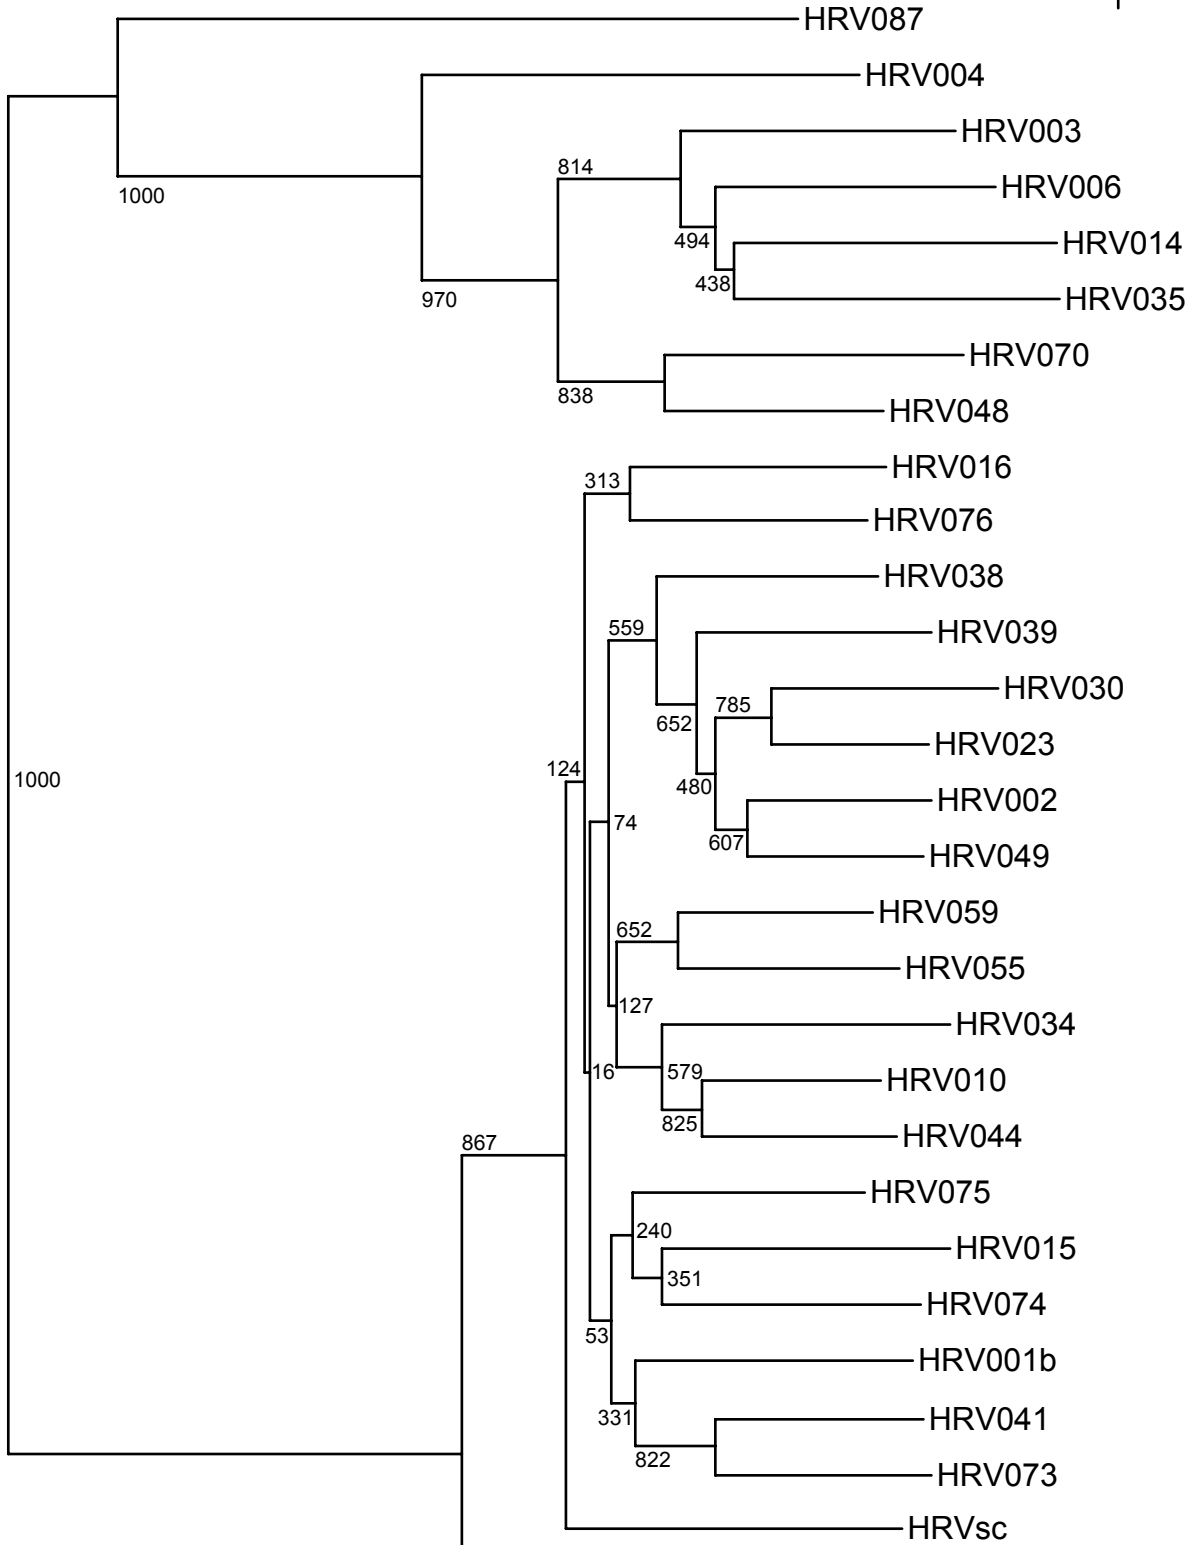

nucleotide-based P2B phylogeny

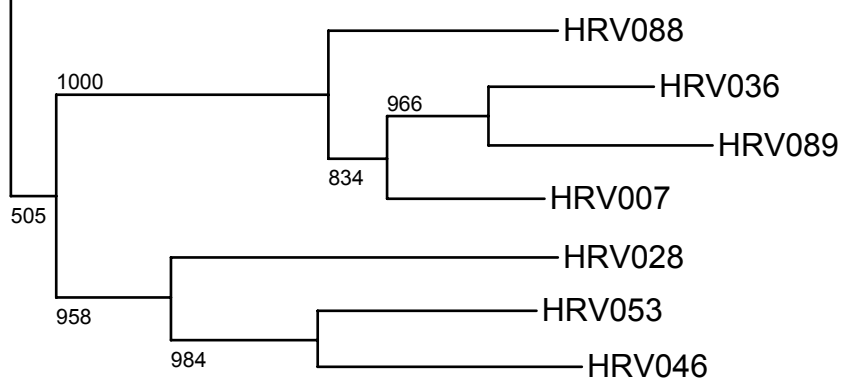

Data S1

0.05

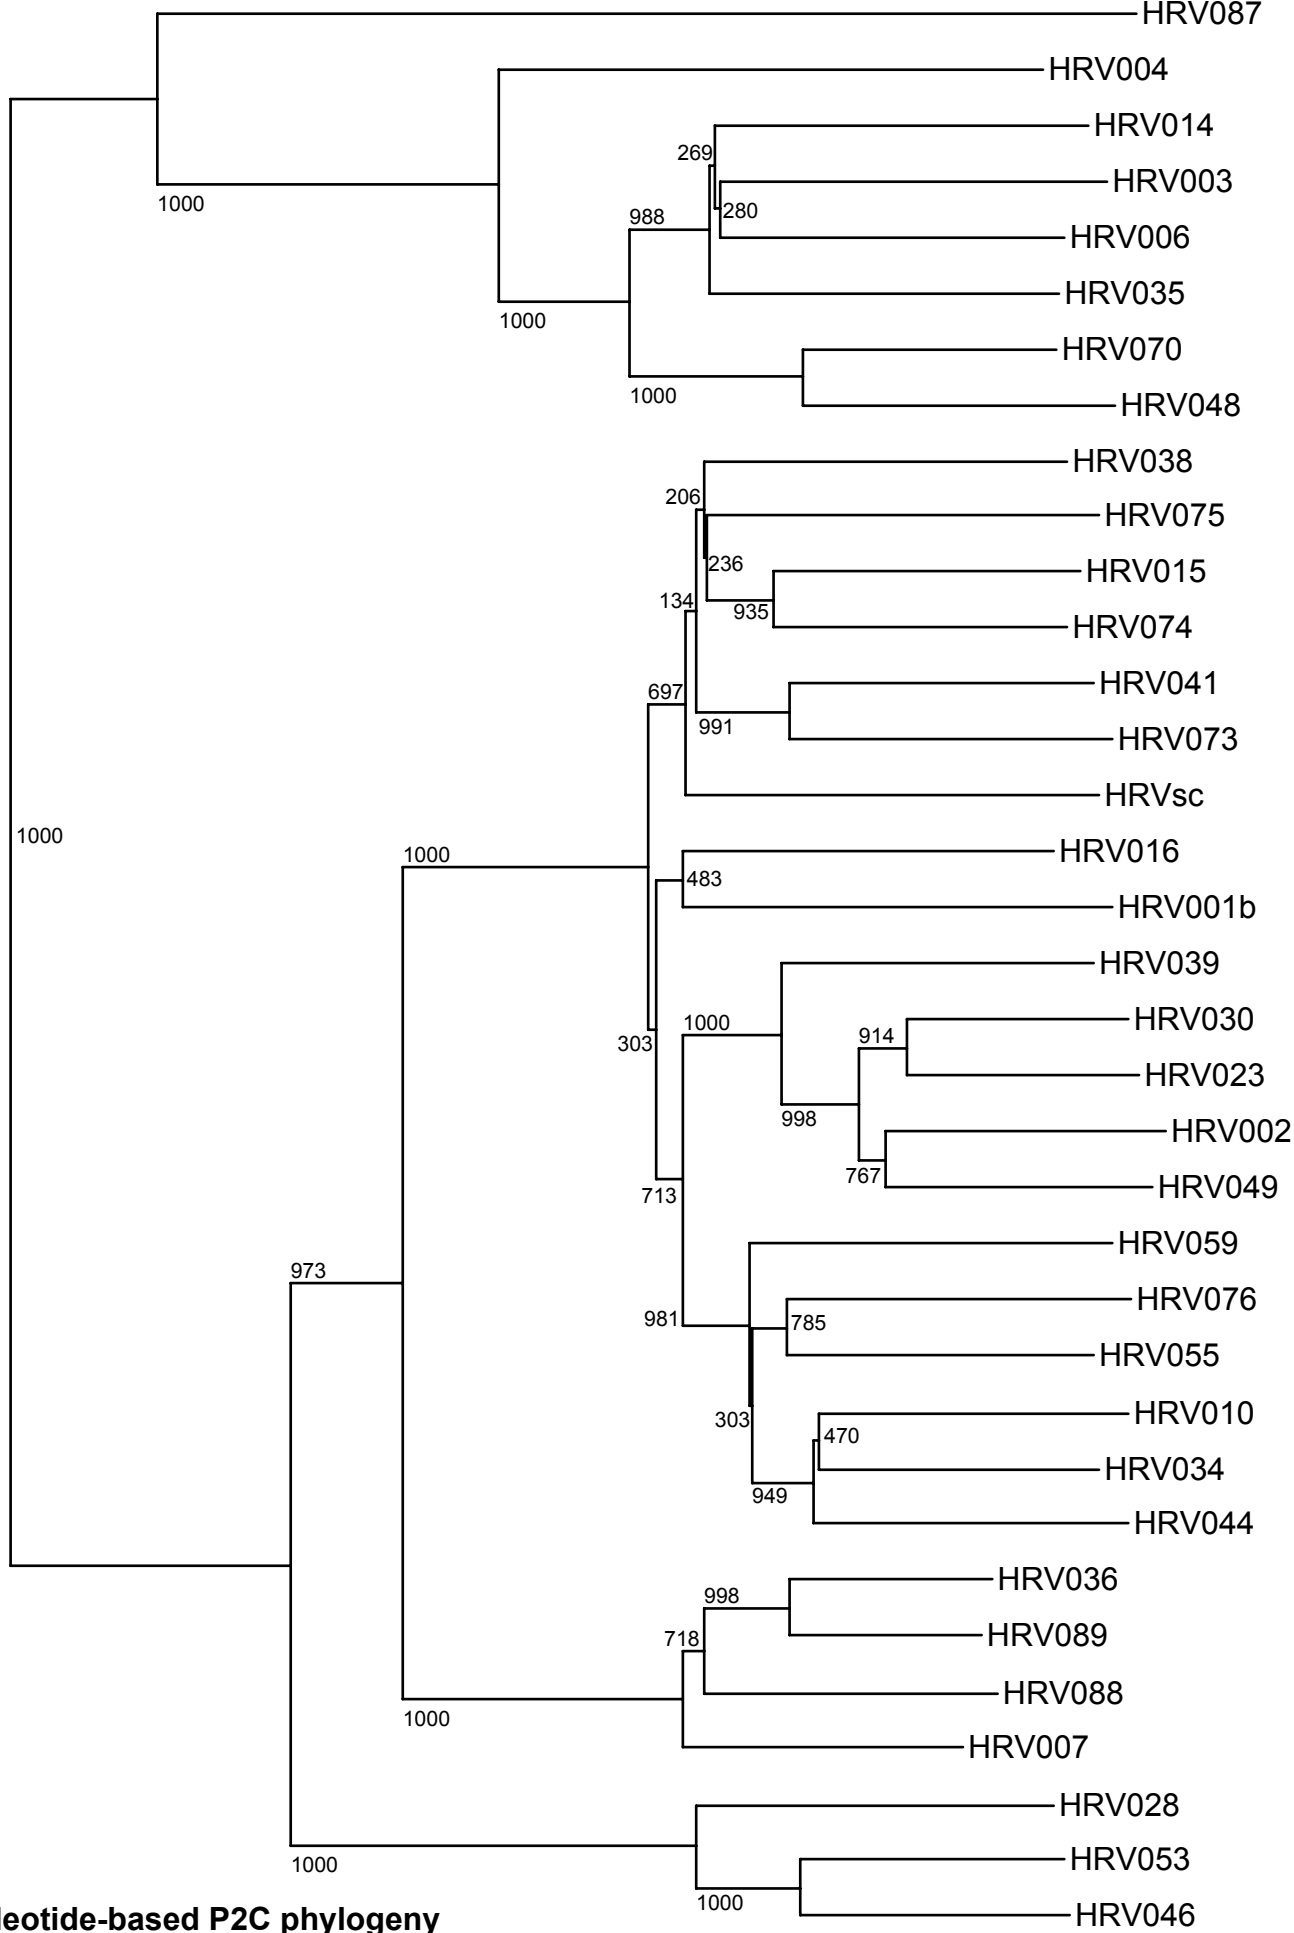

nucleotide-based P2C phylogeny

Data S1

0.05

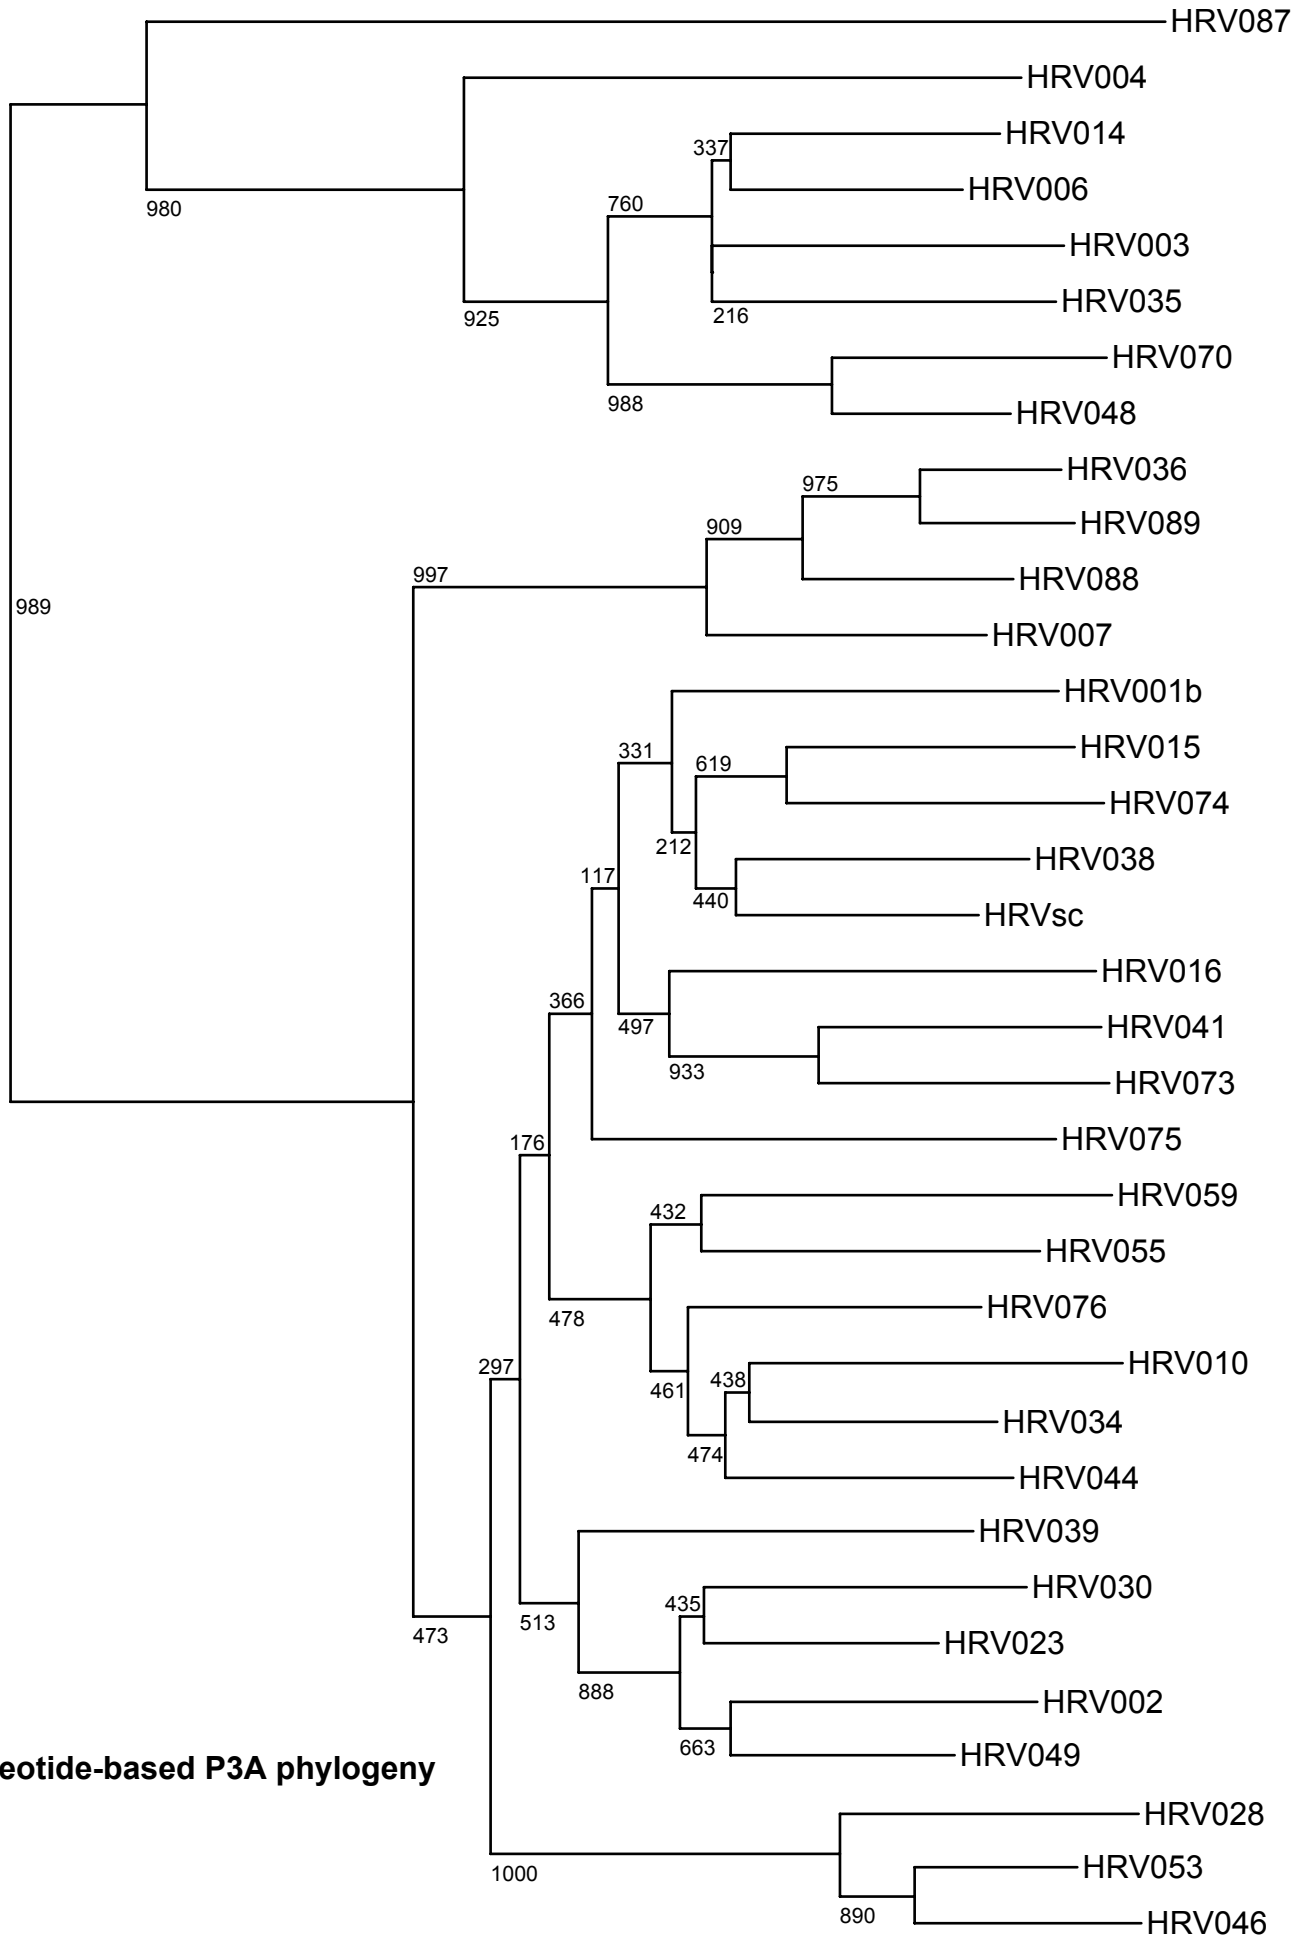

nucleotide-based P3A phylogeny

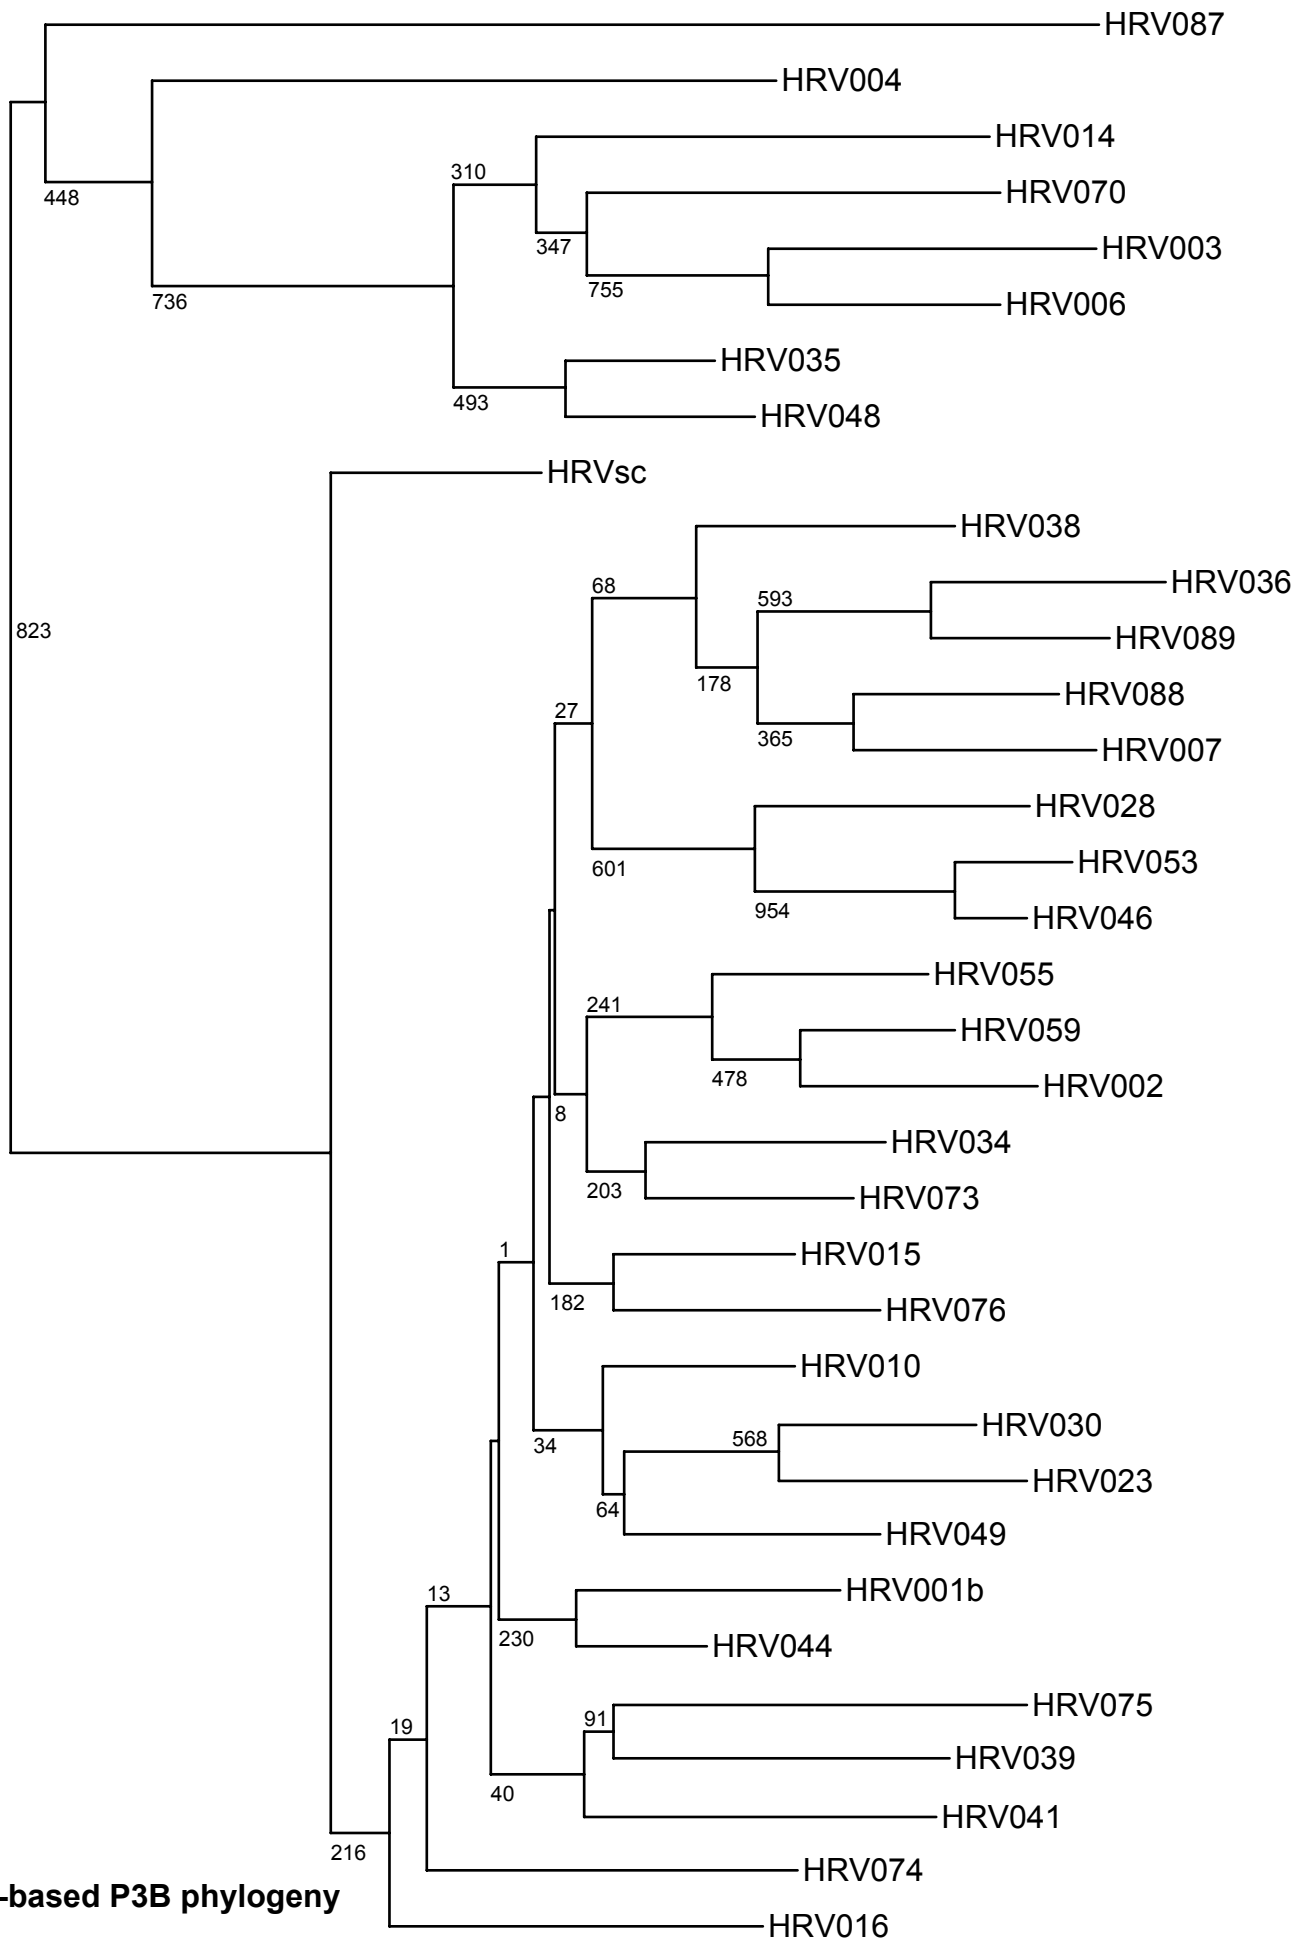

nucleotide-based P3B phylogeny

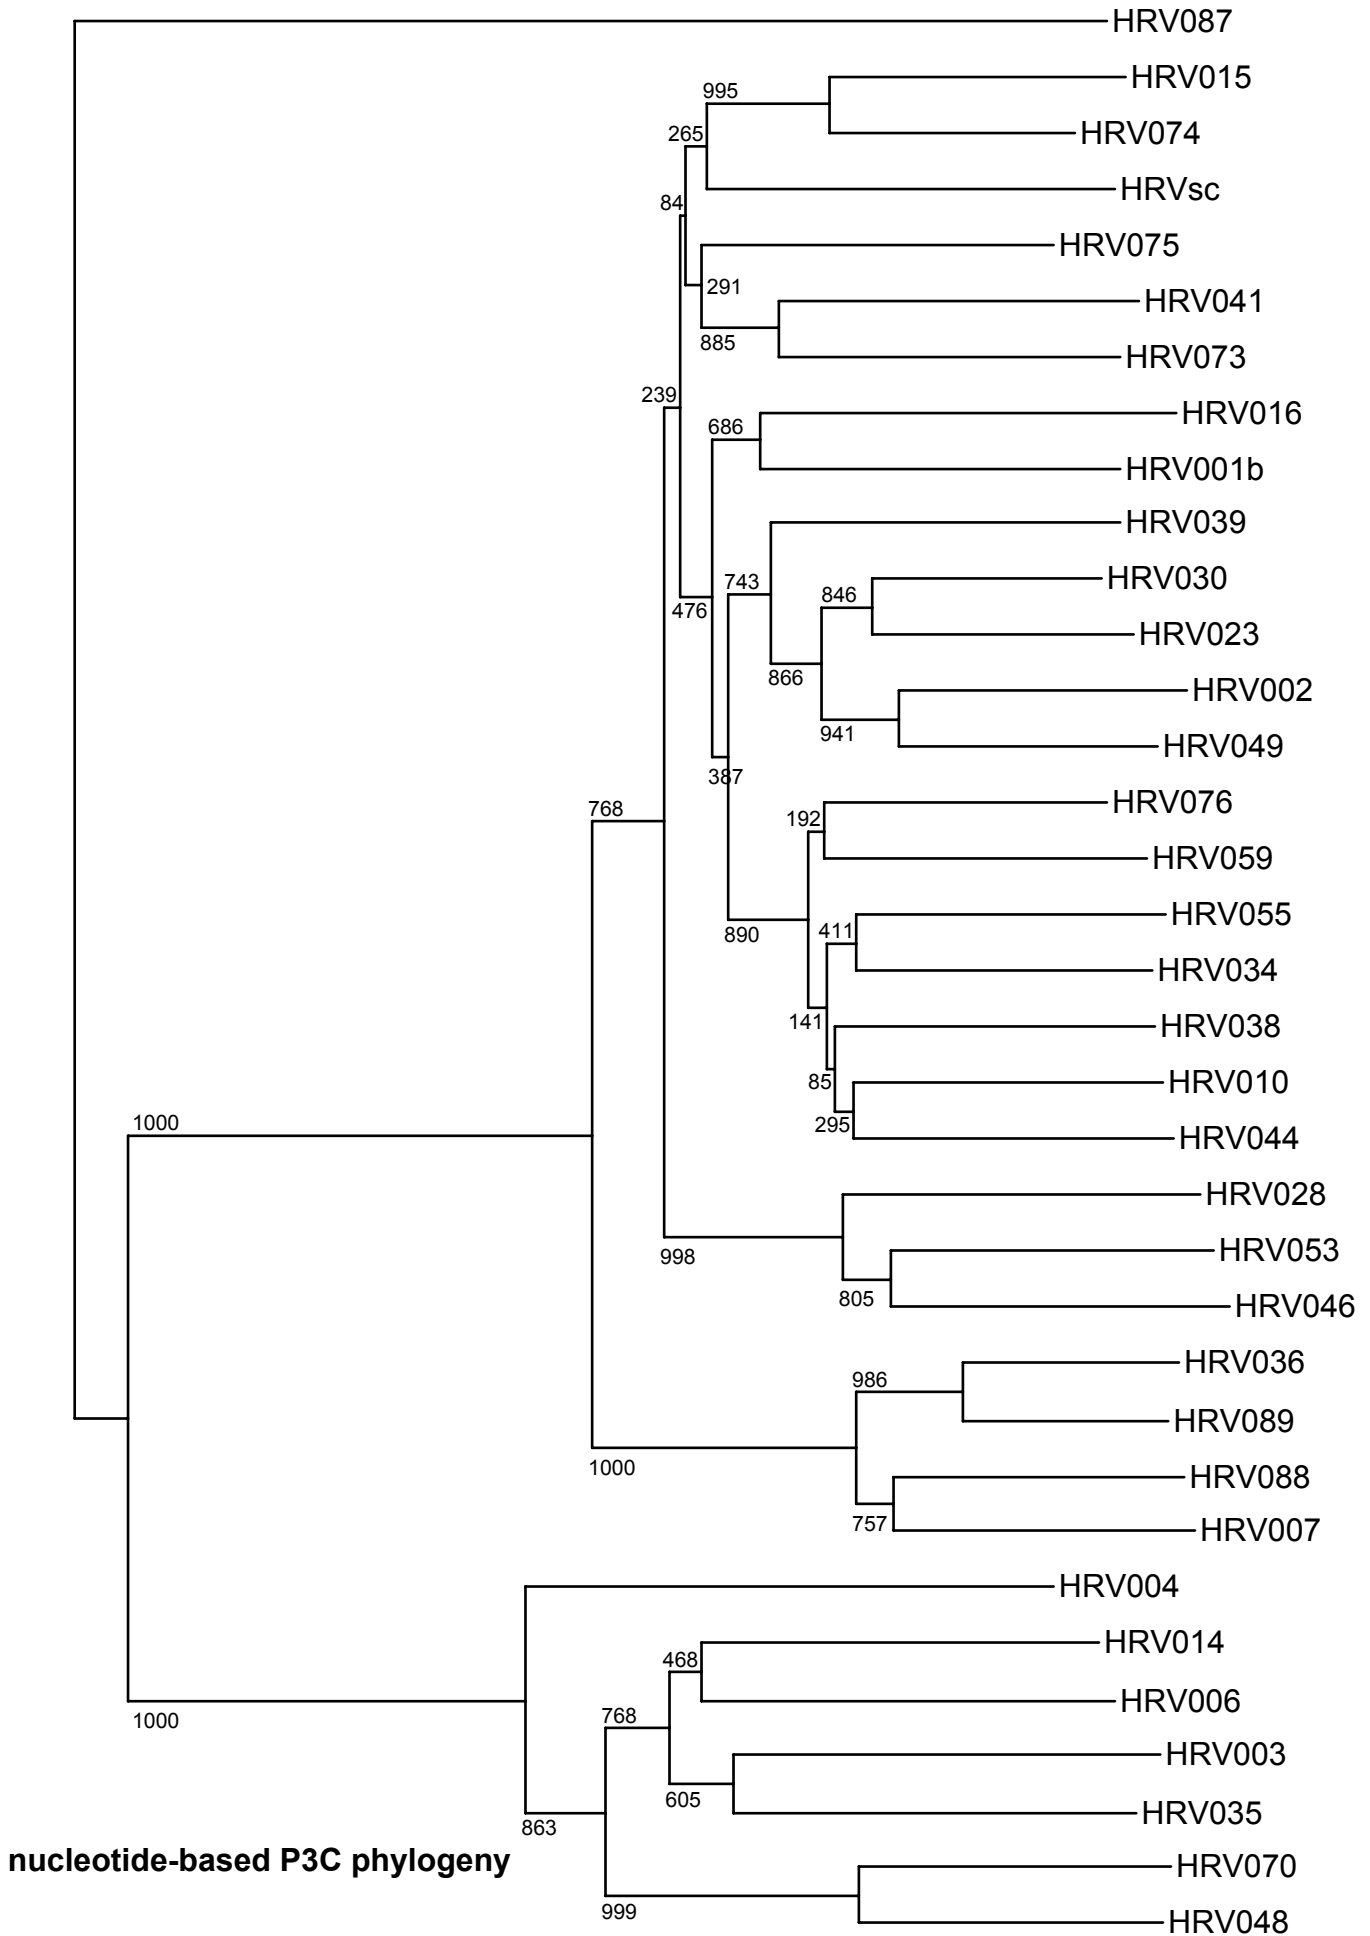



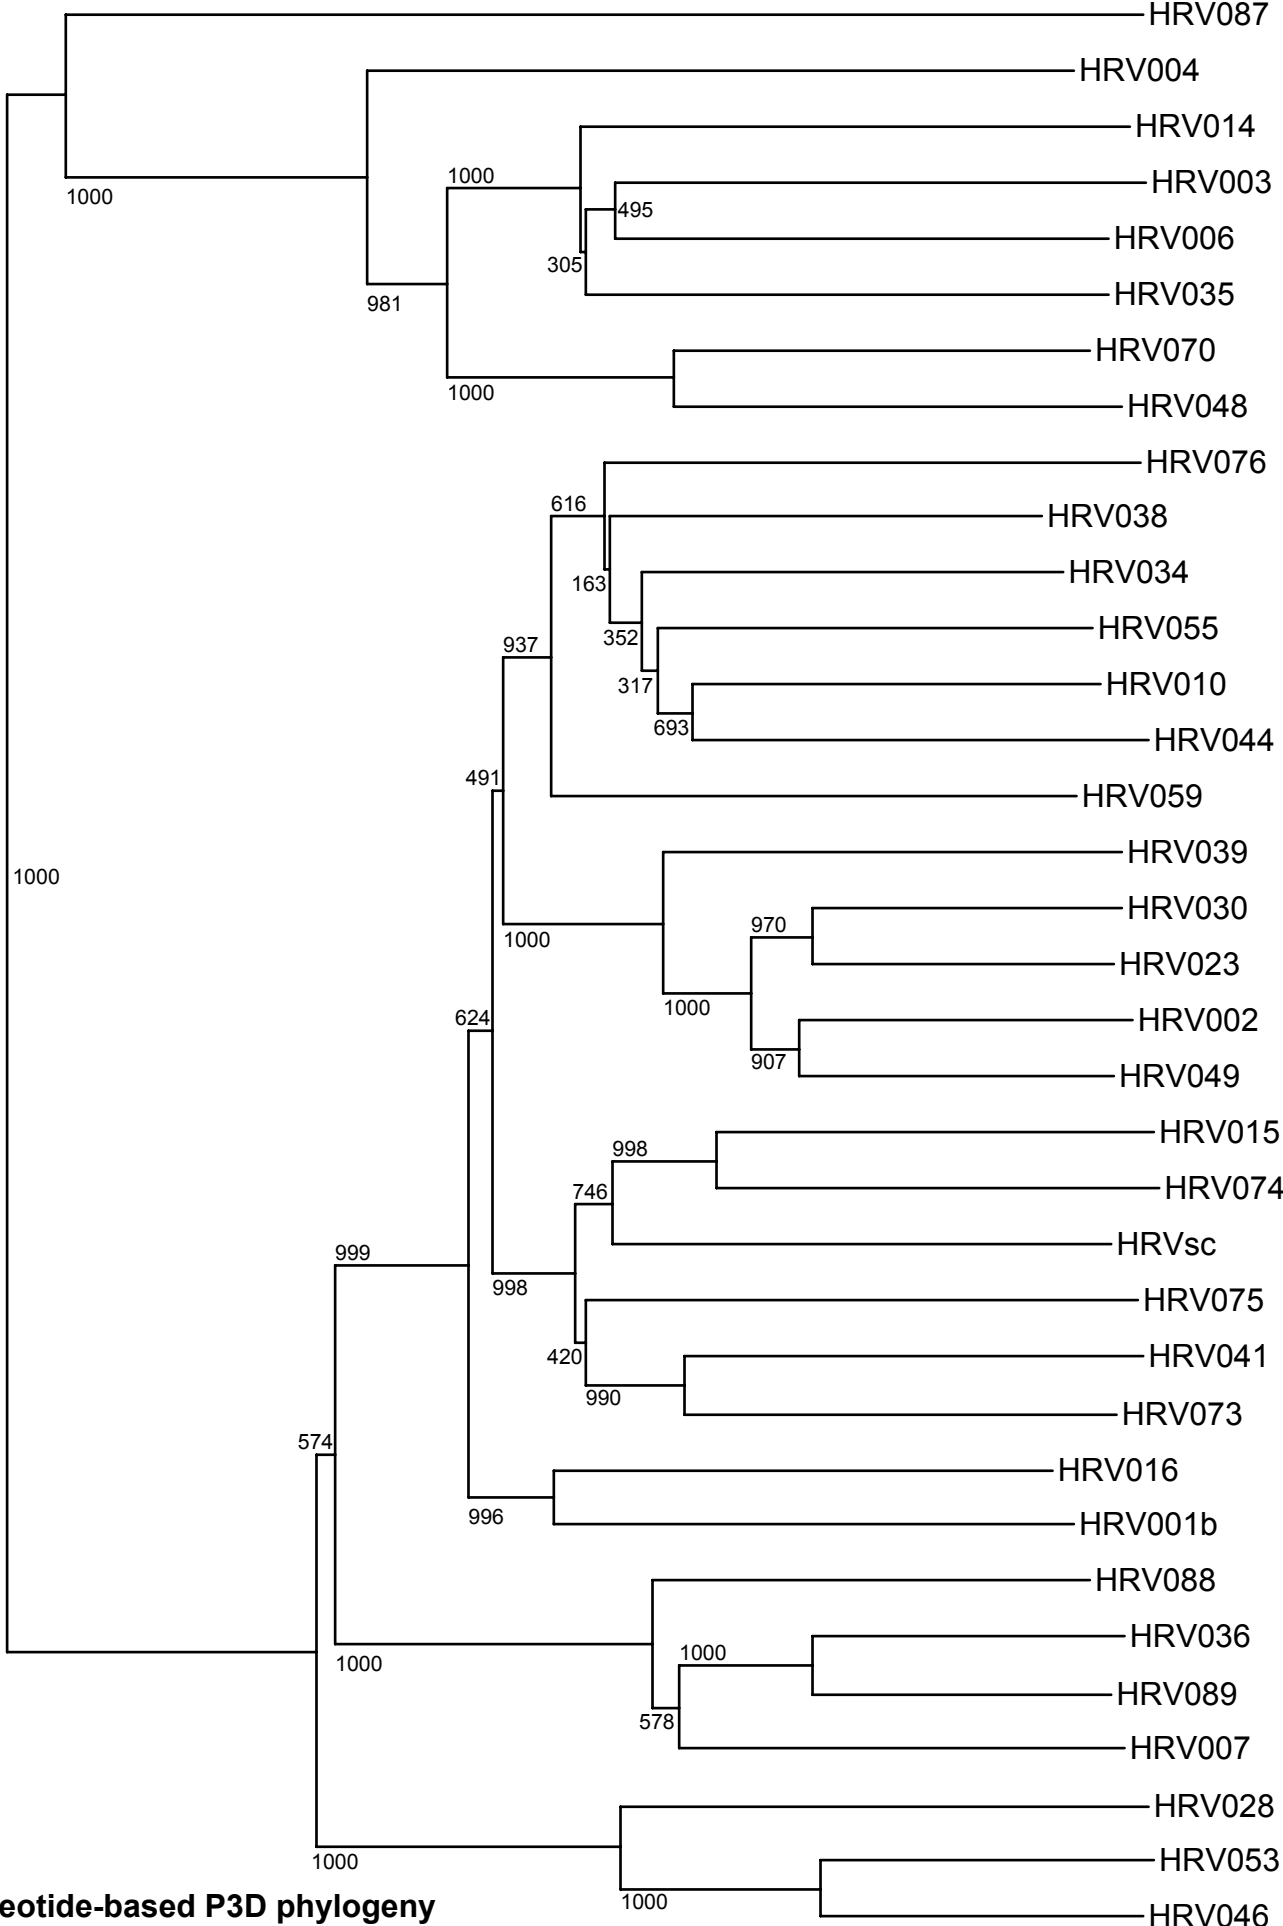

nucleotide-based P3D phylogeny

0.05

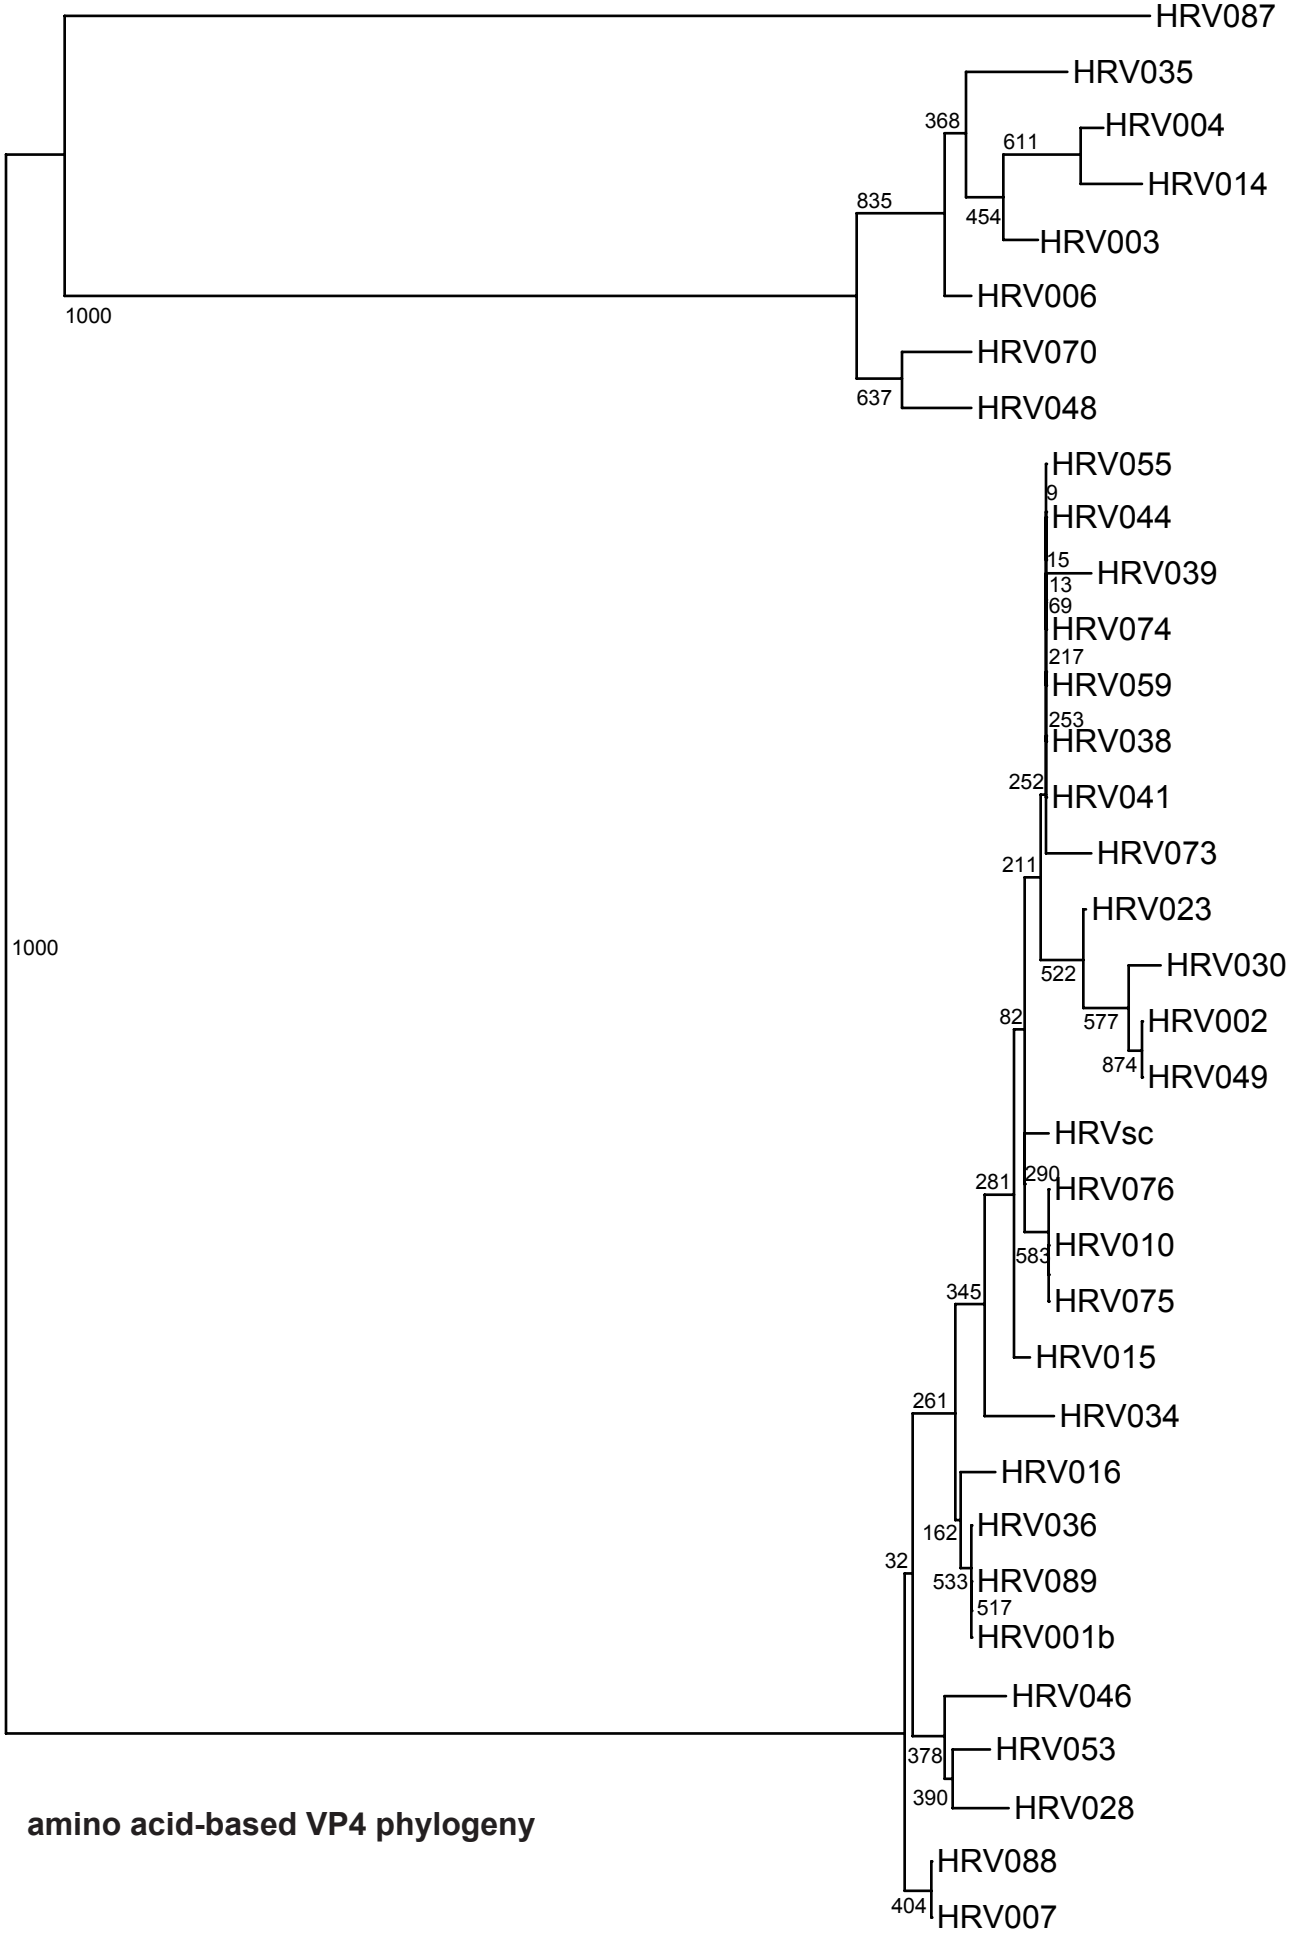



0.05

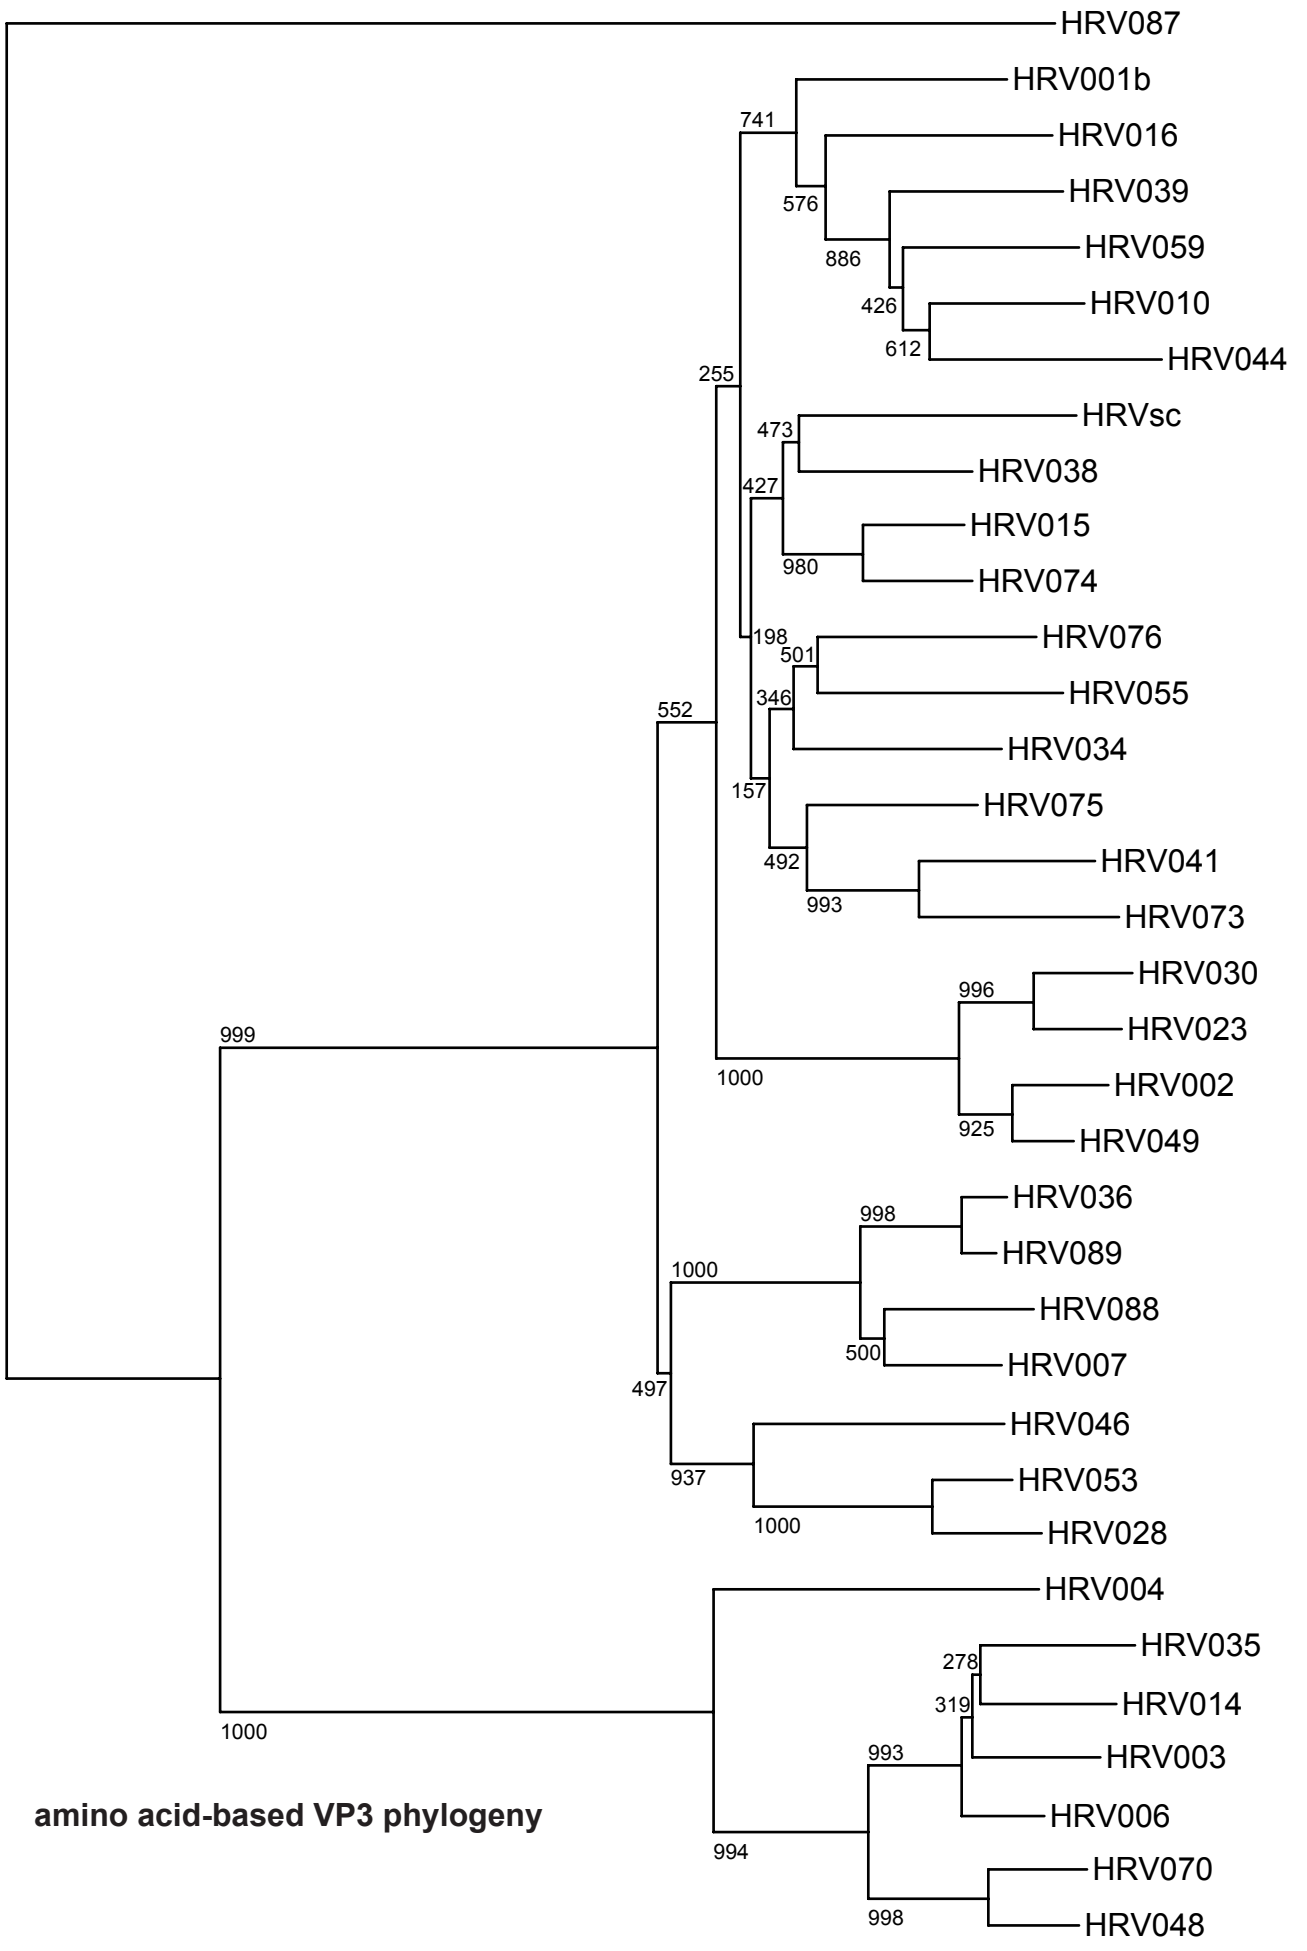

**amino acid-based VP3 phylogeny**

HRV087

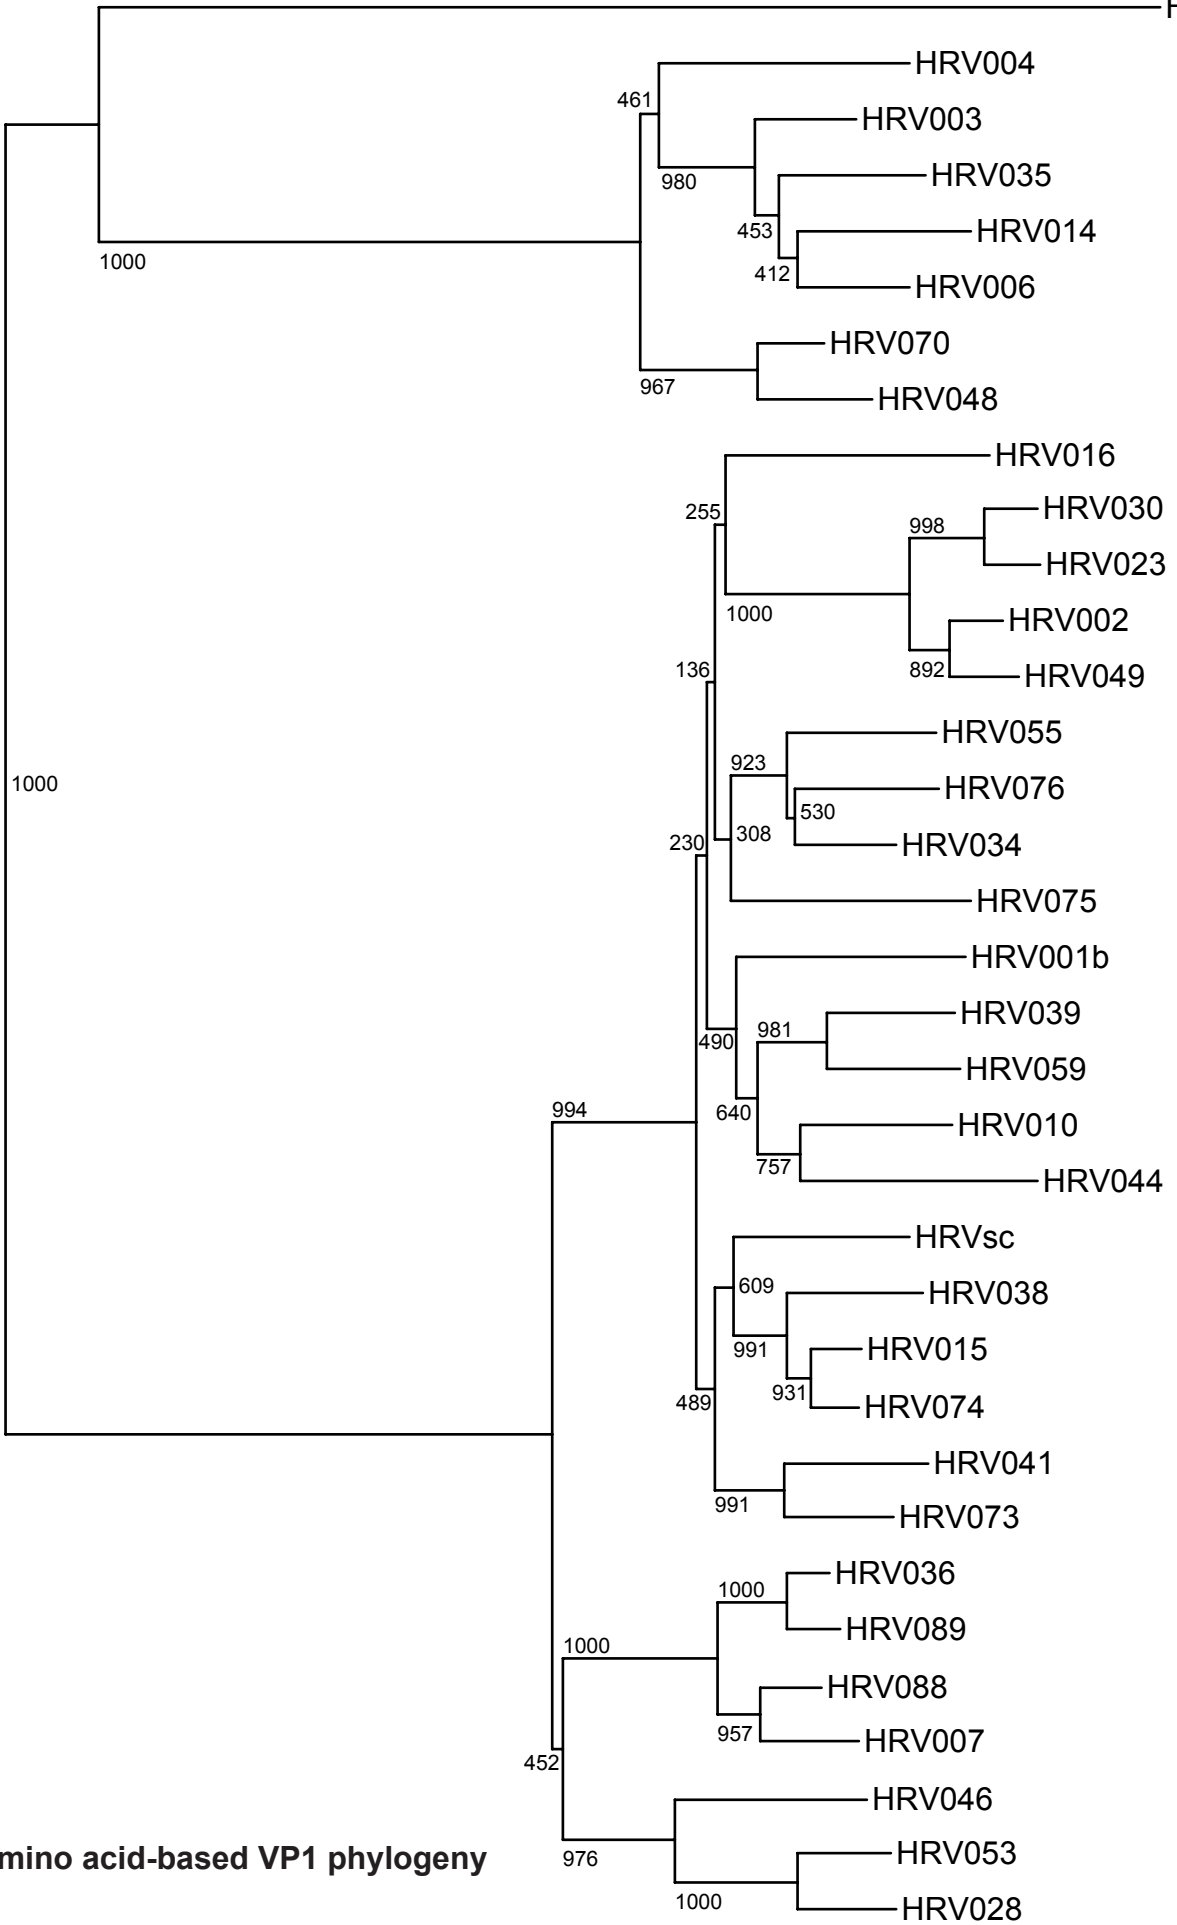

**amino acid-based VP1 phylogeny**

0.1

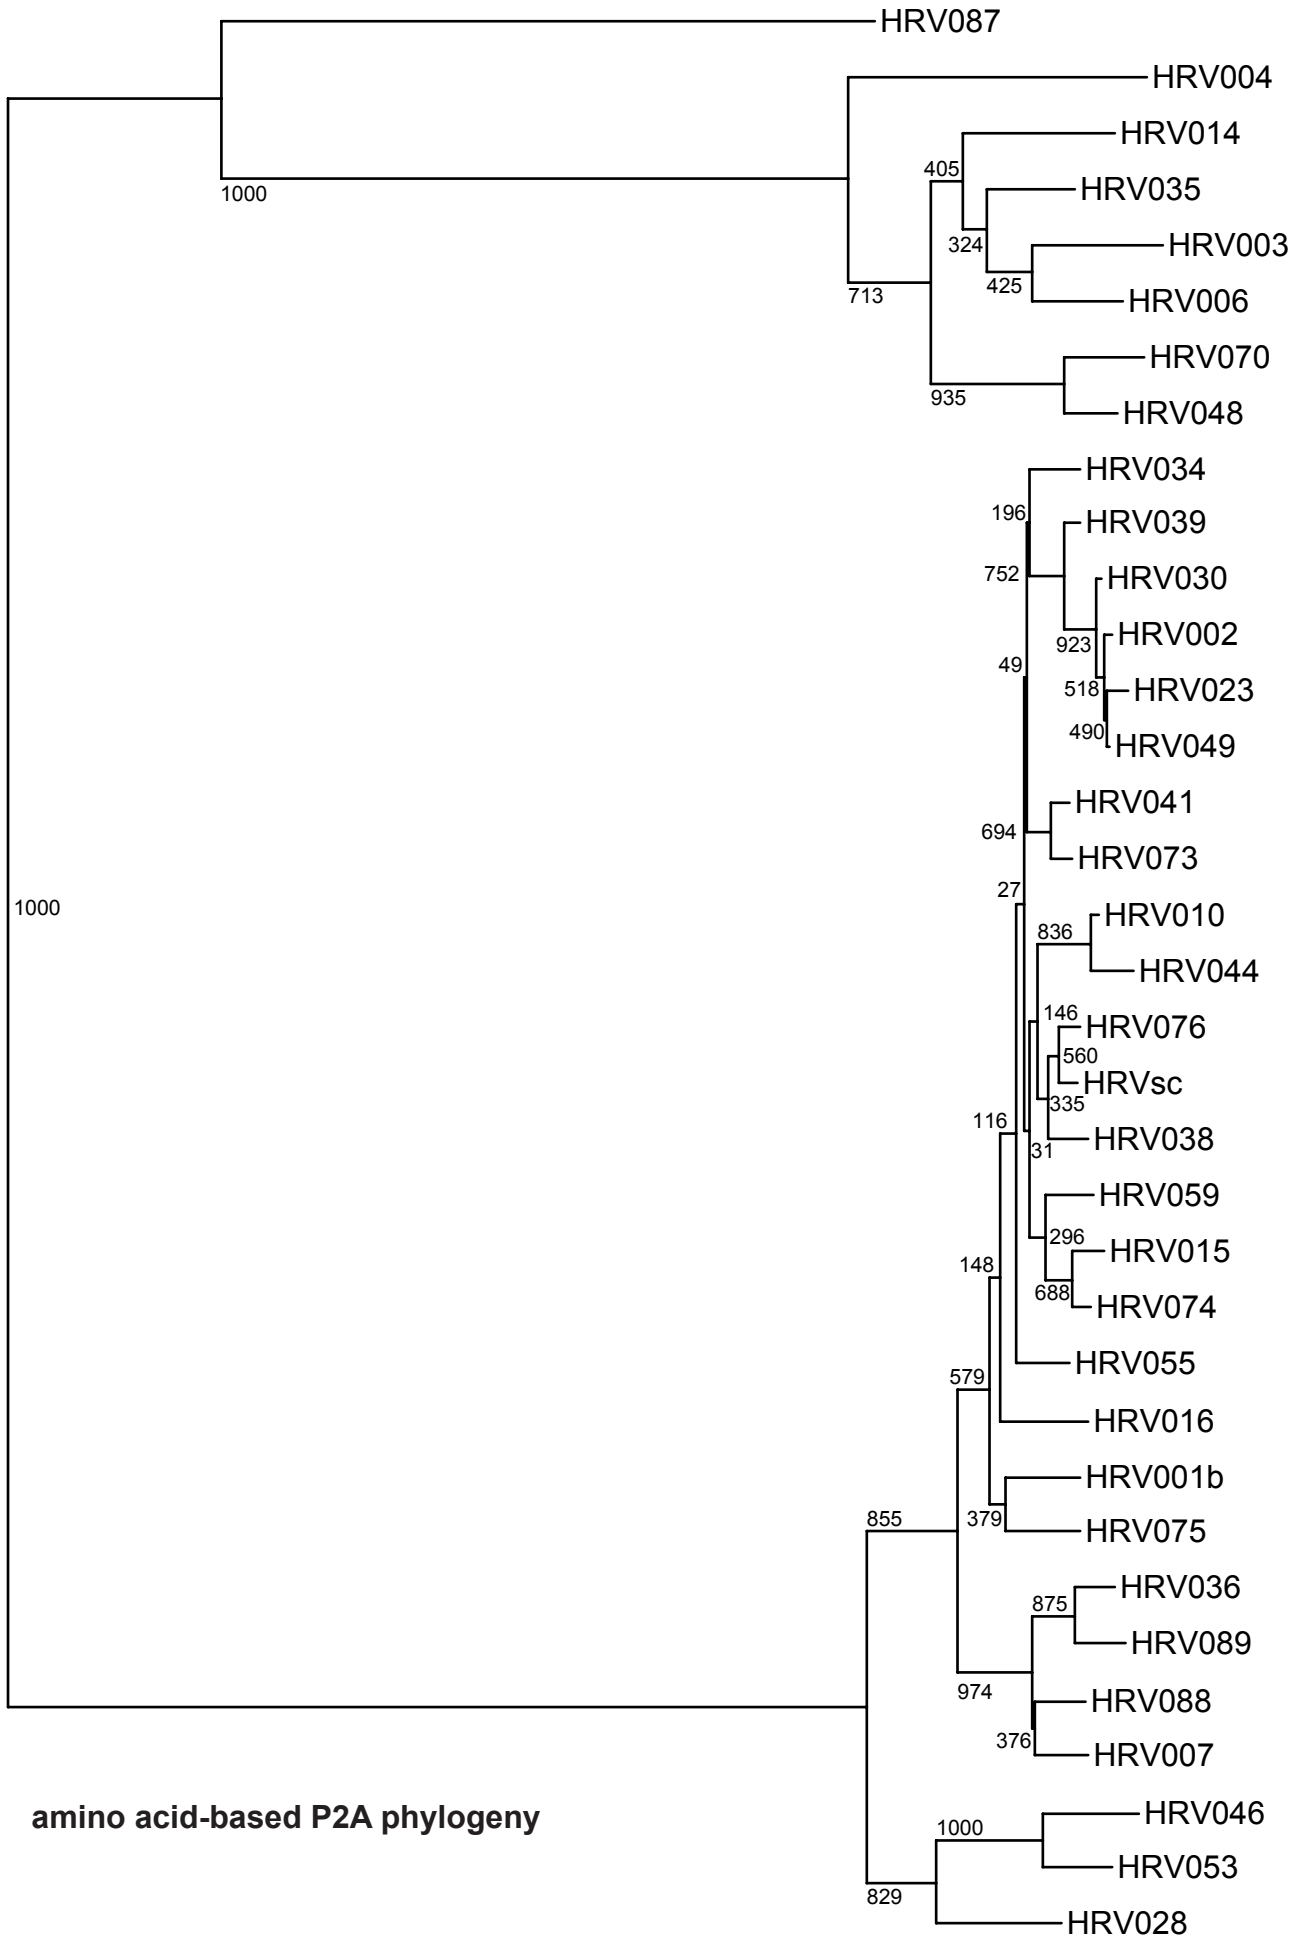

amino acid-based P2A phylogeny

0.1

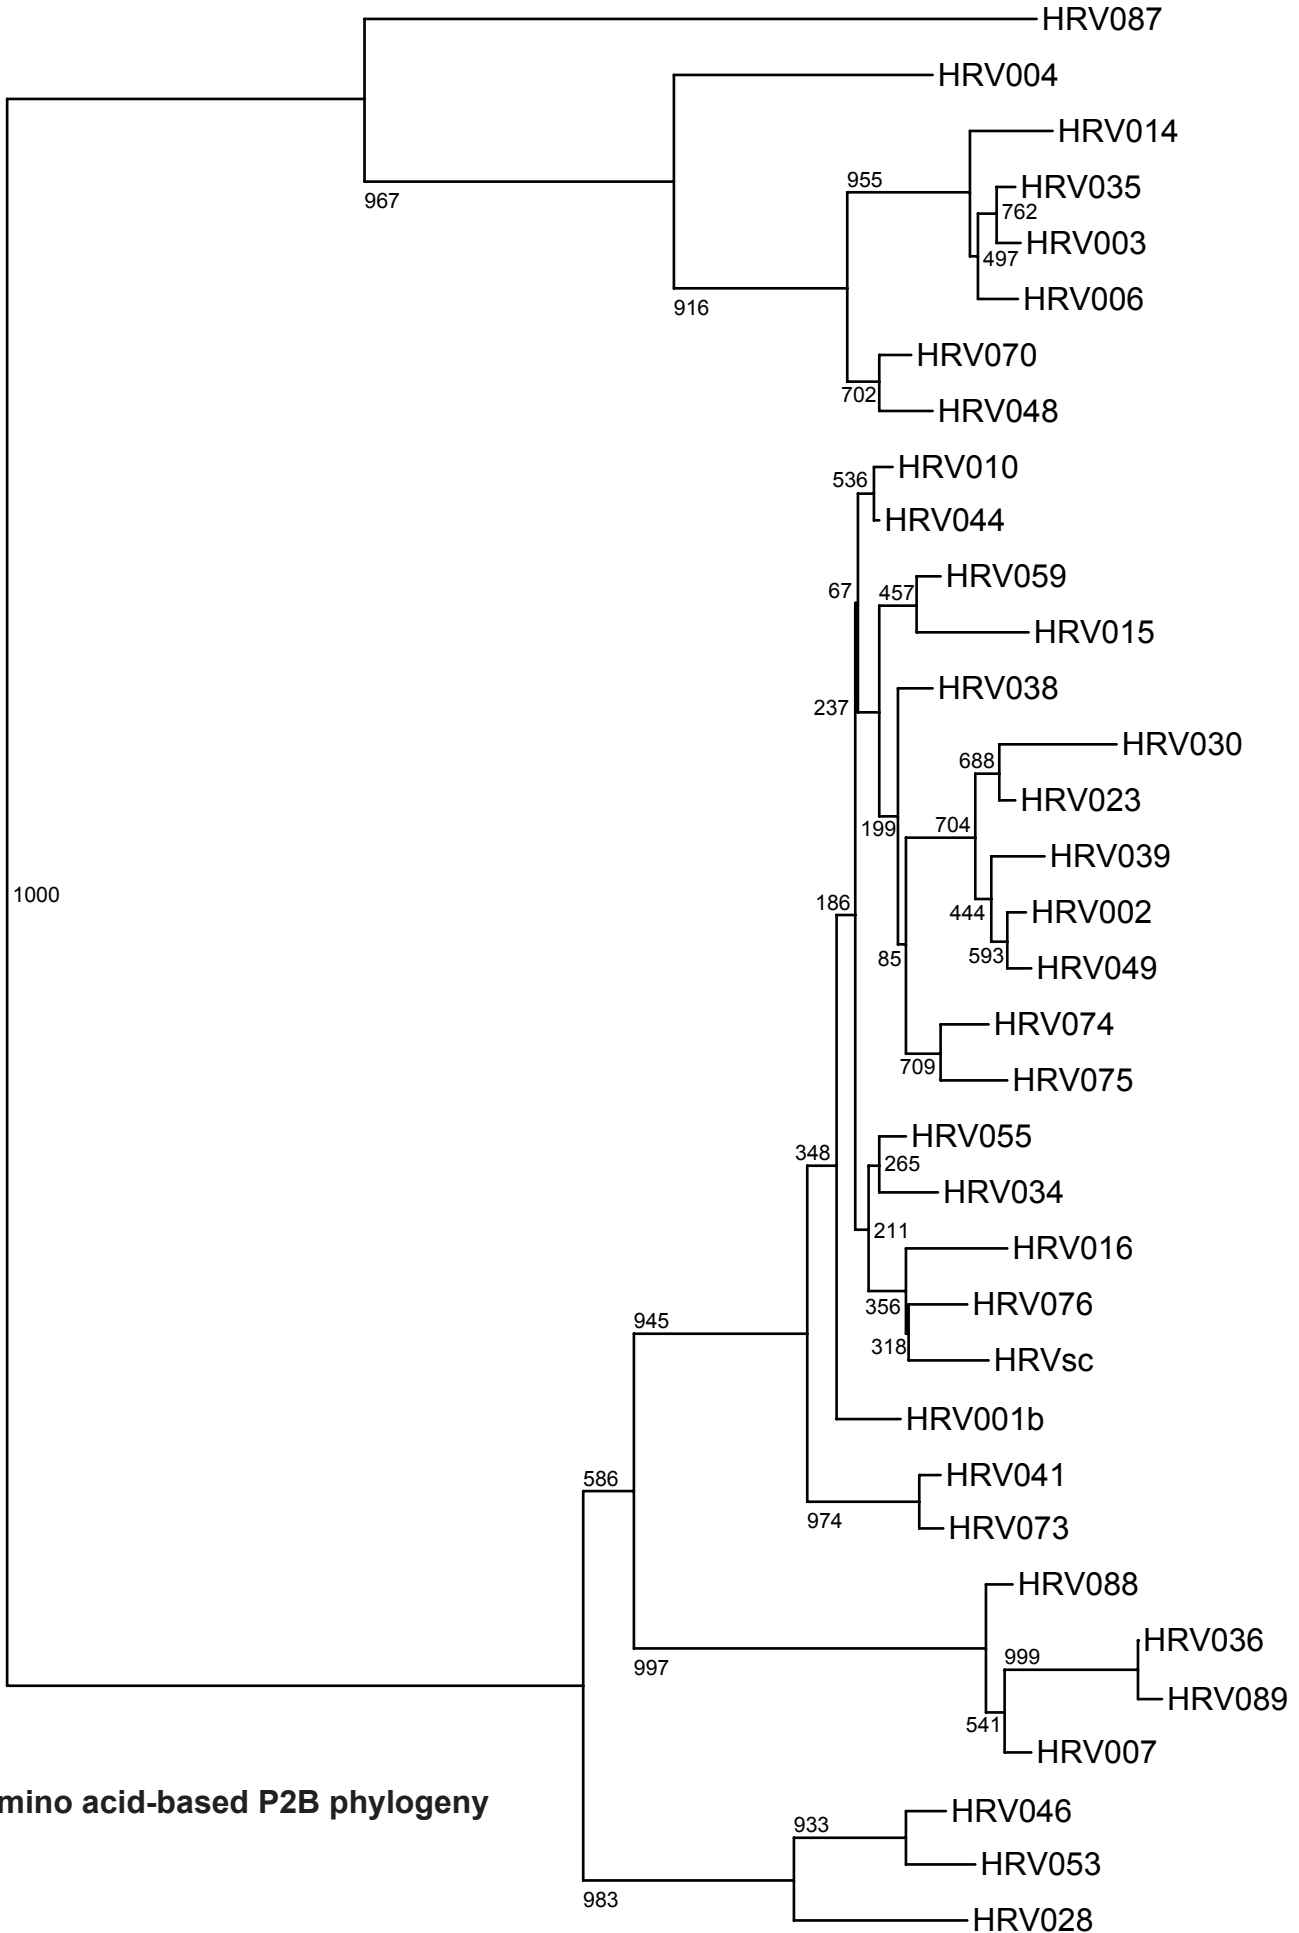

**amino acid-based P2B phylogeny**





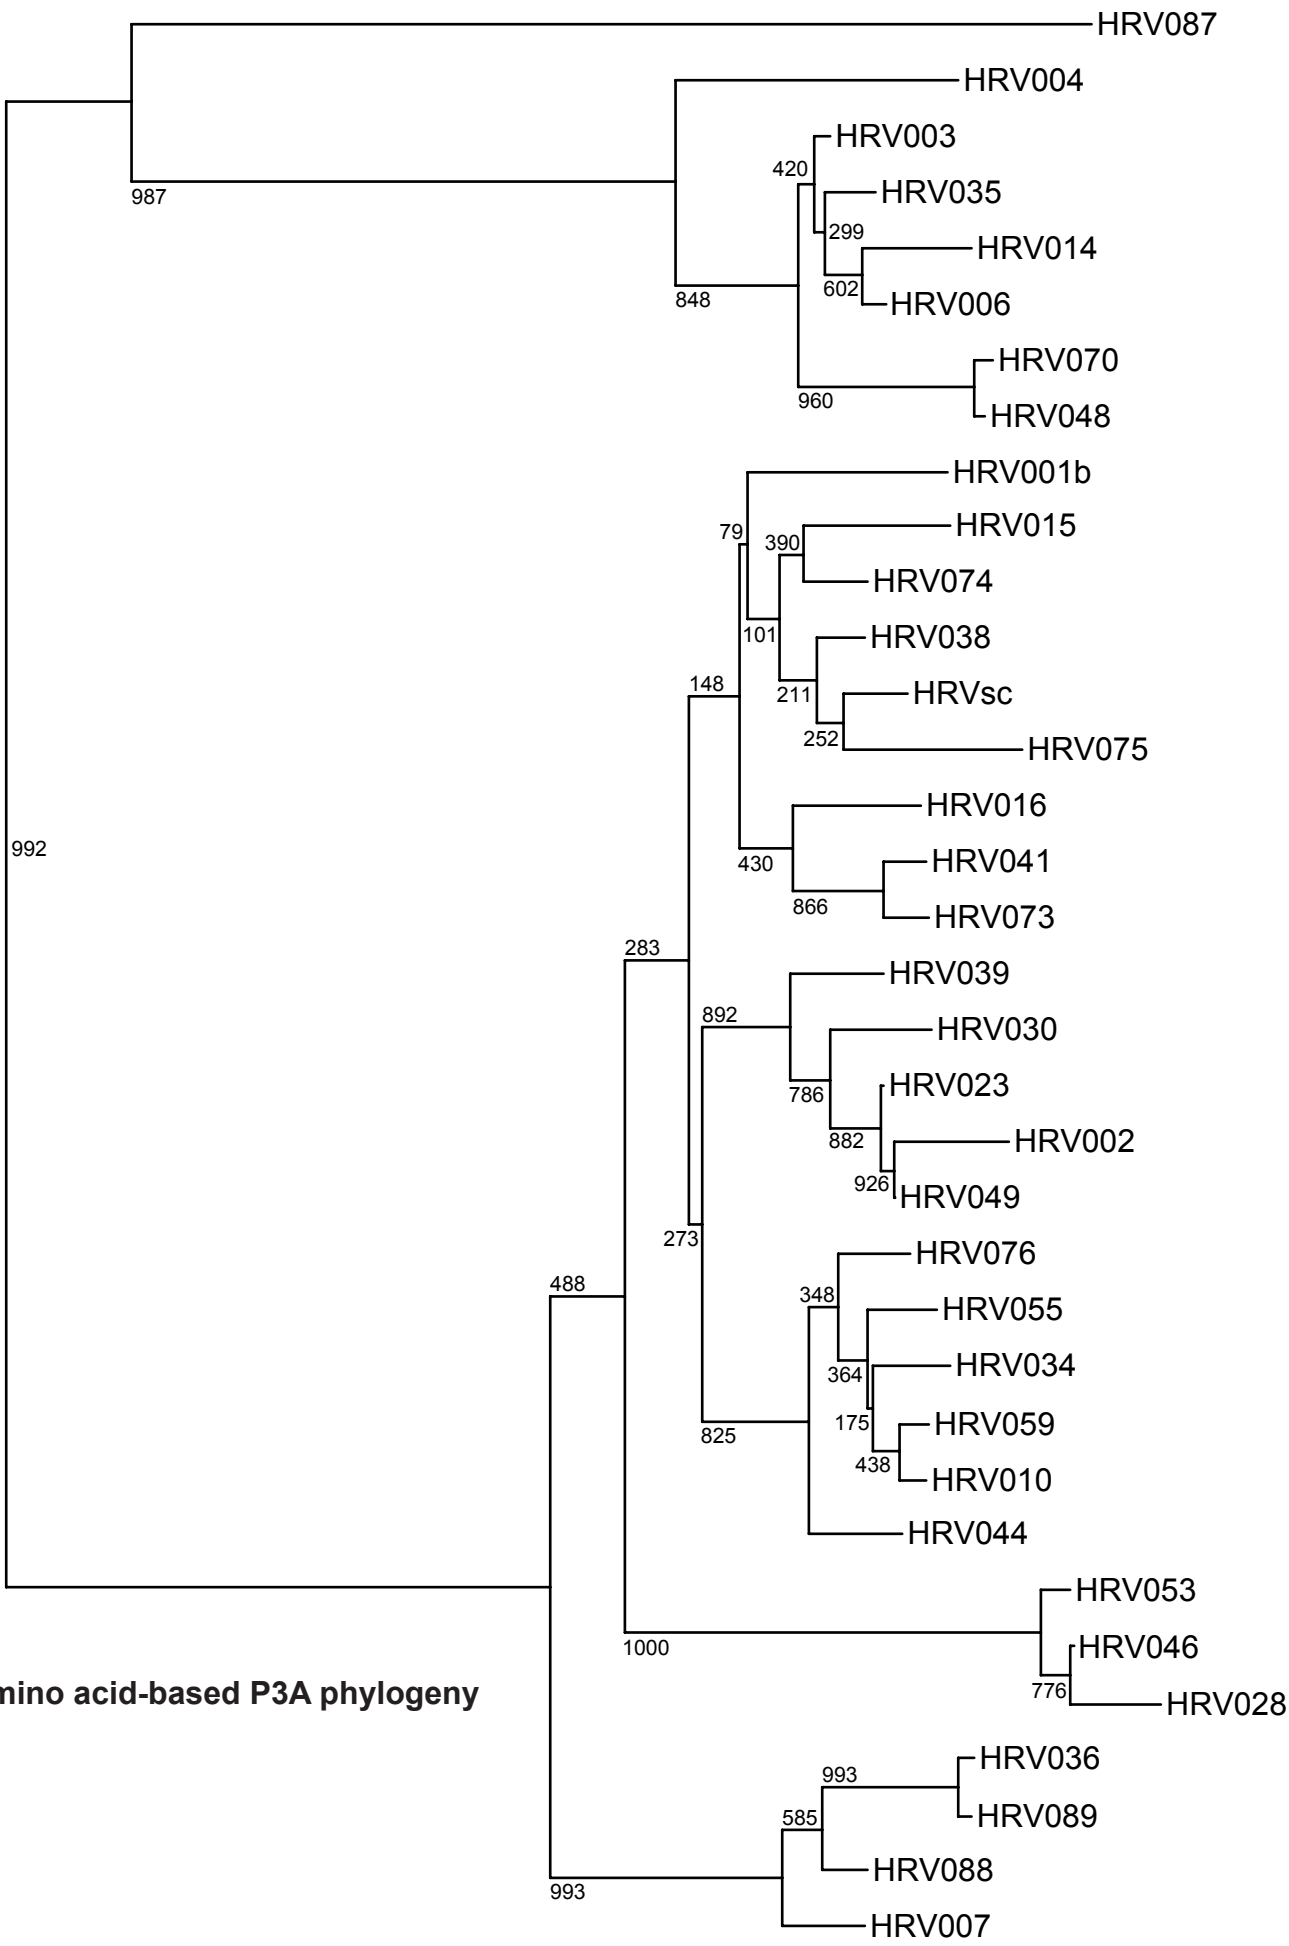

**amino acid-based P3A phylogeny**

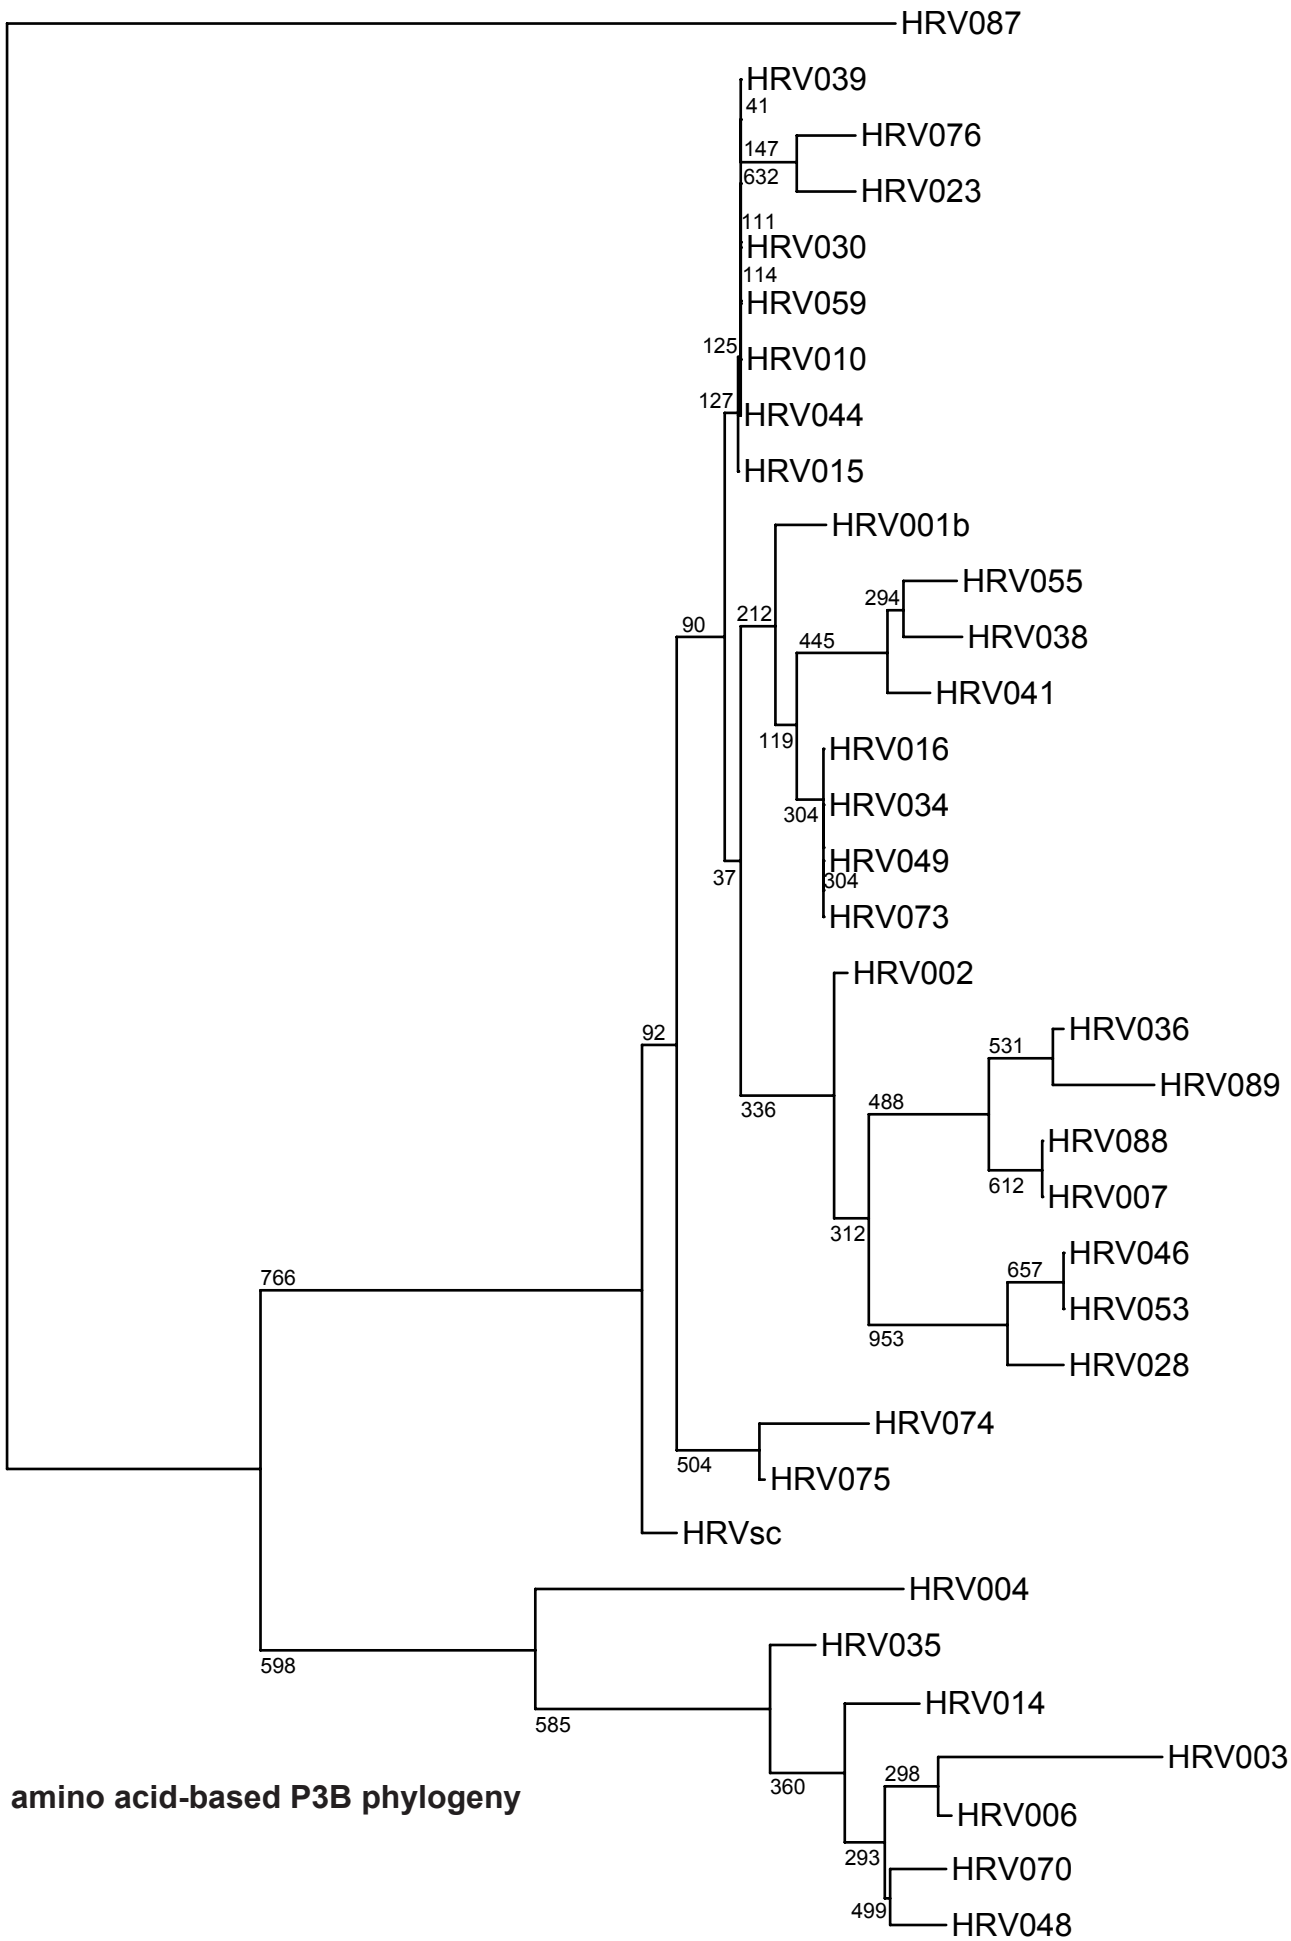

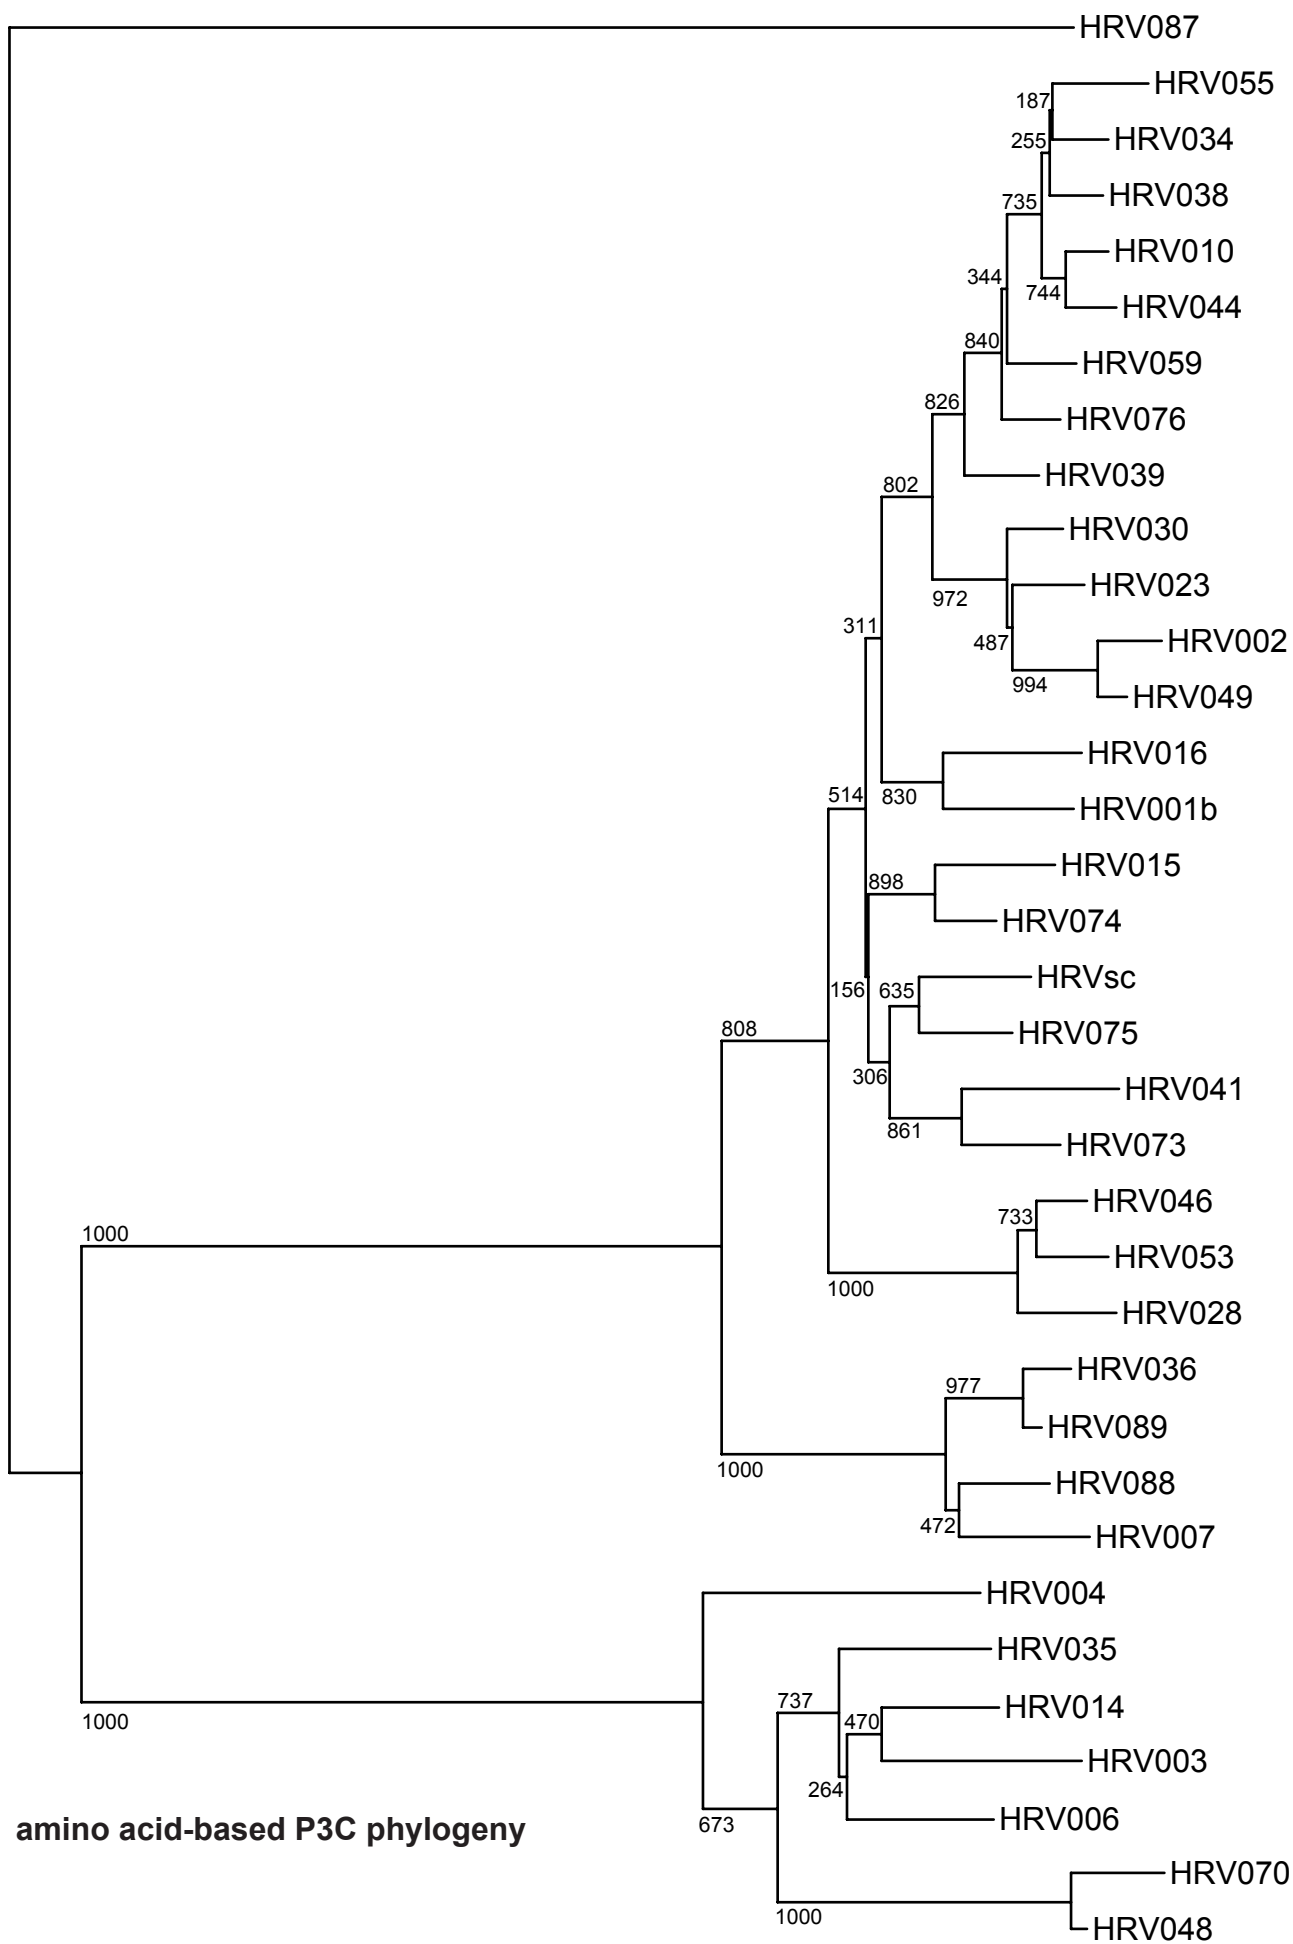

amino acid-based P3C phylogeny

0.05

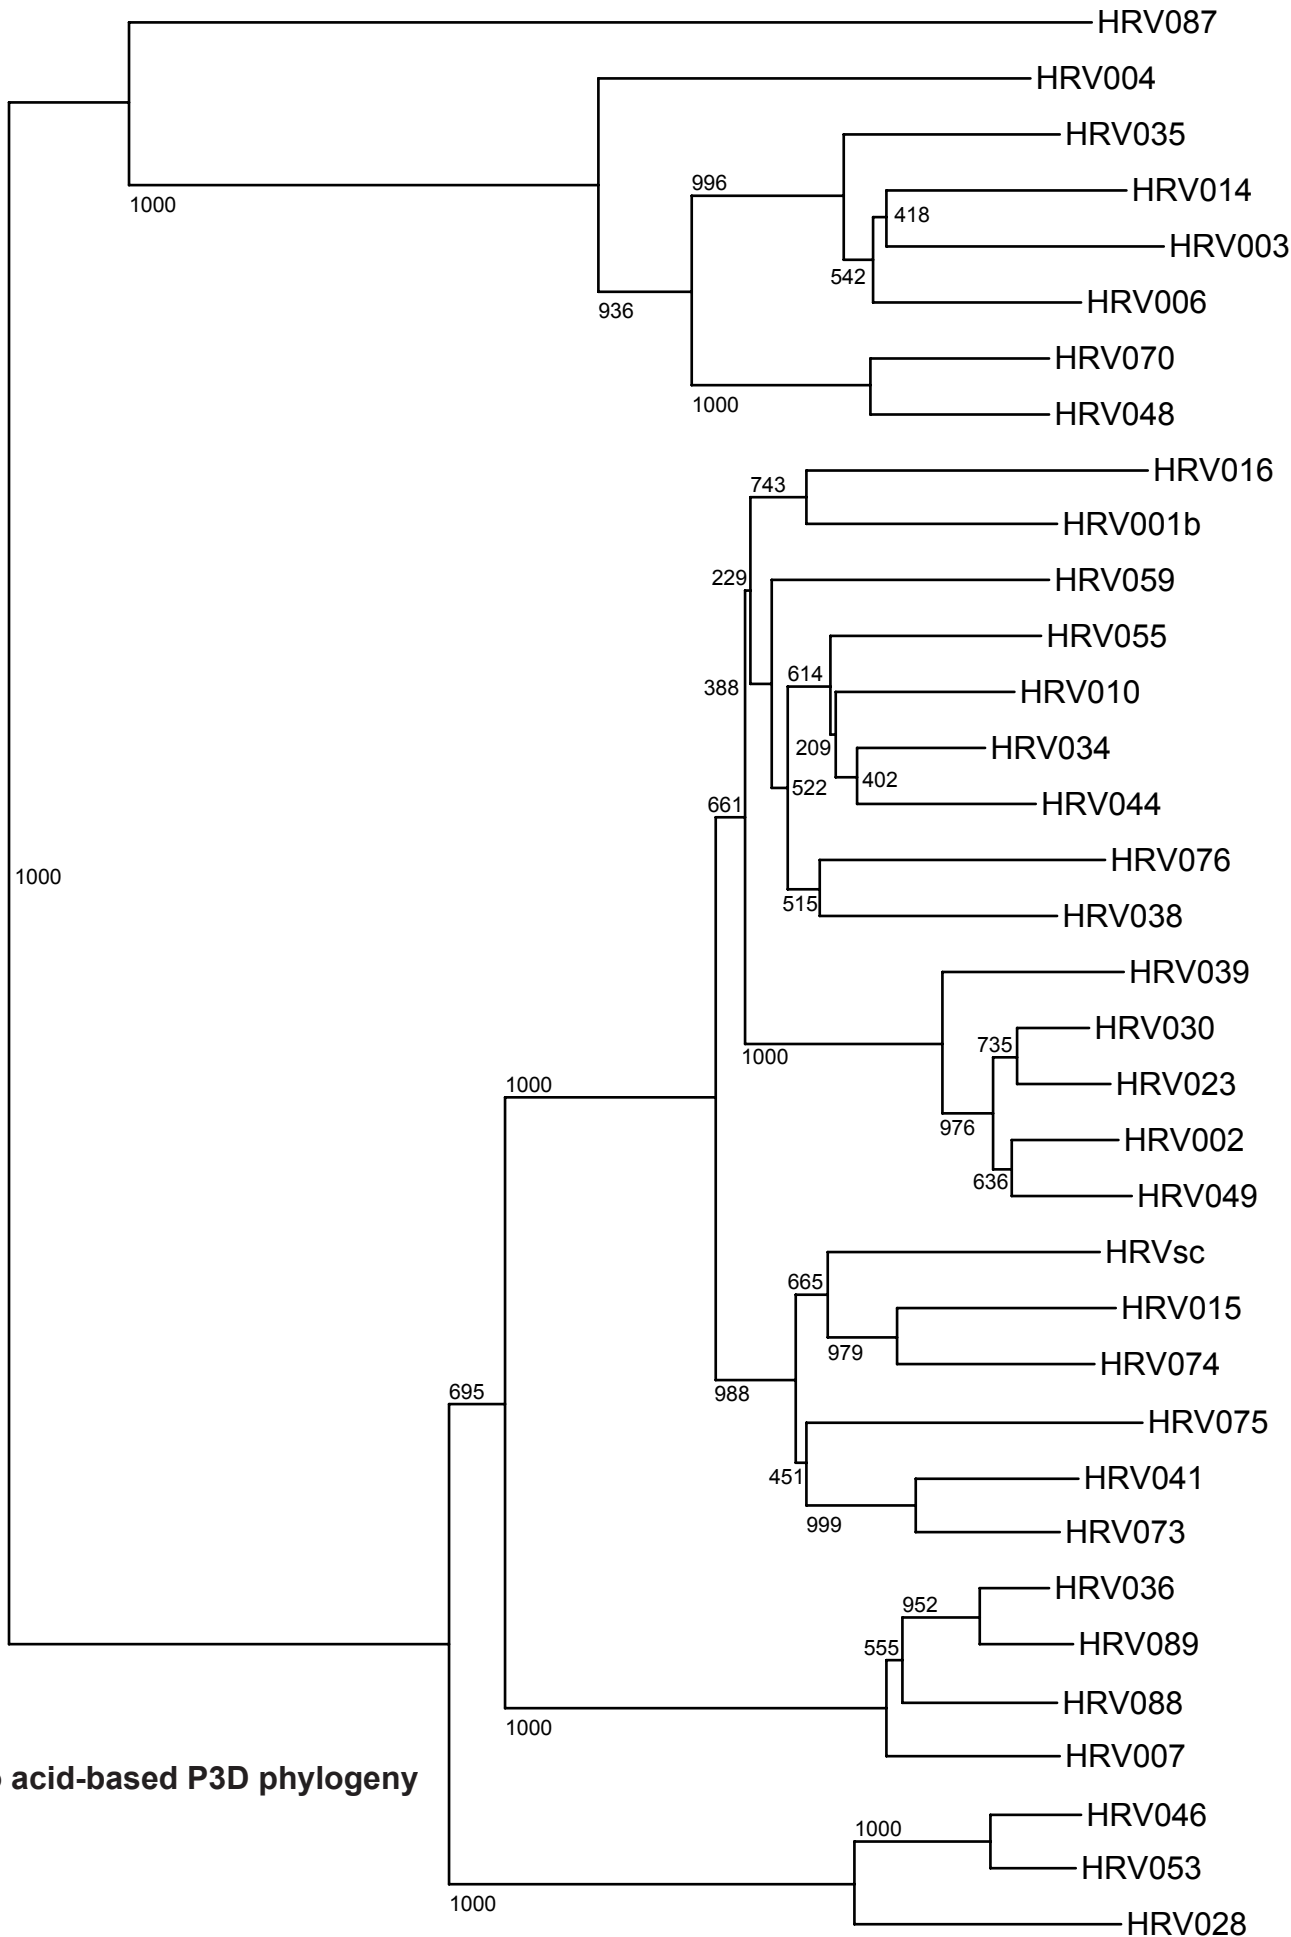

**amino acid-based P3D phylogeny**
