# Supplementary material for: Genome-wide diversity and selective pressure in the human rhinovirus
Source: PubMed Central journal article supplement (PMC1892812; doi:10.1186/1743-422x-4-40), 2007-05-03
Supplement: 1743-422X-4-40-S2.pdf [file 1743-422X-4-40-S2.pdf]

**Figure S4 – Comparison of pairwise nucleotide sequence identity profiles of HRV and HEVs.**

Top, Picornavirus genome organization. Genome schematic depicting genes in coding regions (boxes) and the non-coding regions (lines). Black bars above genome schematic indicate classes of gene products and gene product identities, where known VP=viral protein; PRO=viral protease; ATPase=DEXH-box ATPase protein; VPg=viral protein genomic (highlighted by dotted box); POL=RNA dependent RNA polymerase; NCR=non-coding region; coordinates of gene boundaries derived from alignment of available HRV genome sequences; gray shading of every other gene is provided for orientation in lower panels. Boxes below, Average pairwise nucleotide identity scans within HRVA, HRVB, HEVA, HEVB, HEVC, and HEVD genomes in a window of 100 nucleotides, advanced in single nucleotide steps across the genome. (PDF)

**Table S1 - Potential recombination events detected among HRV serotypes.**

Fig. S4

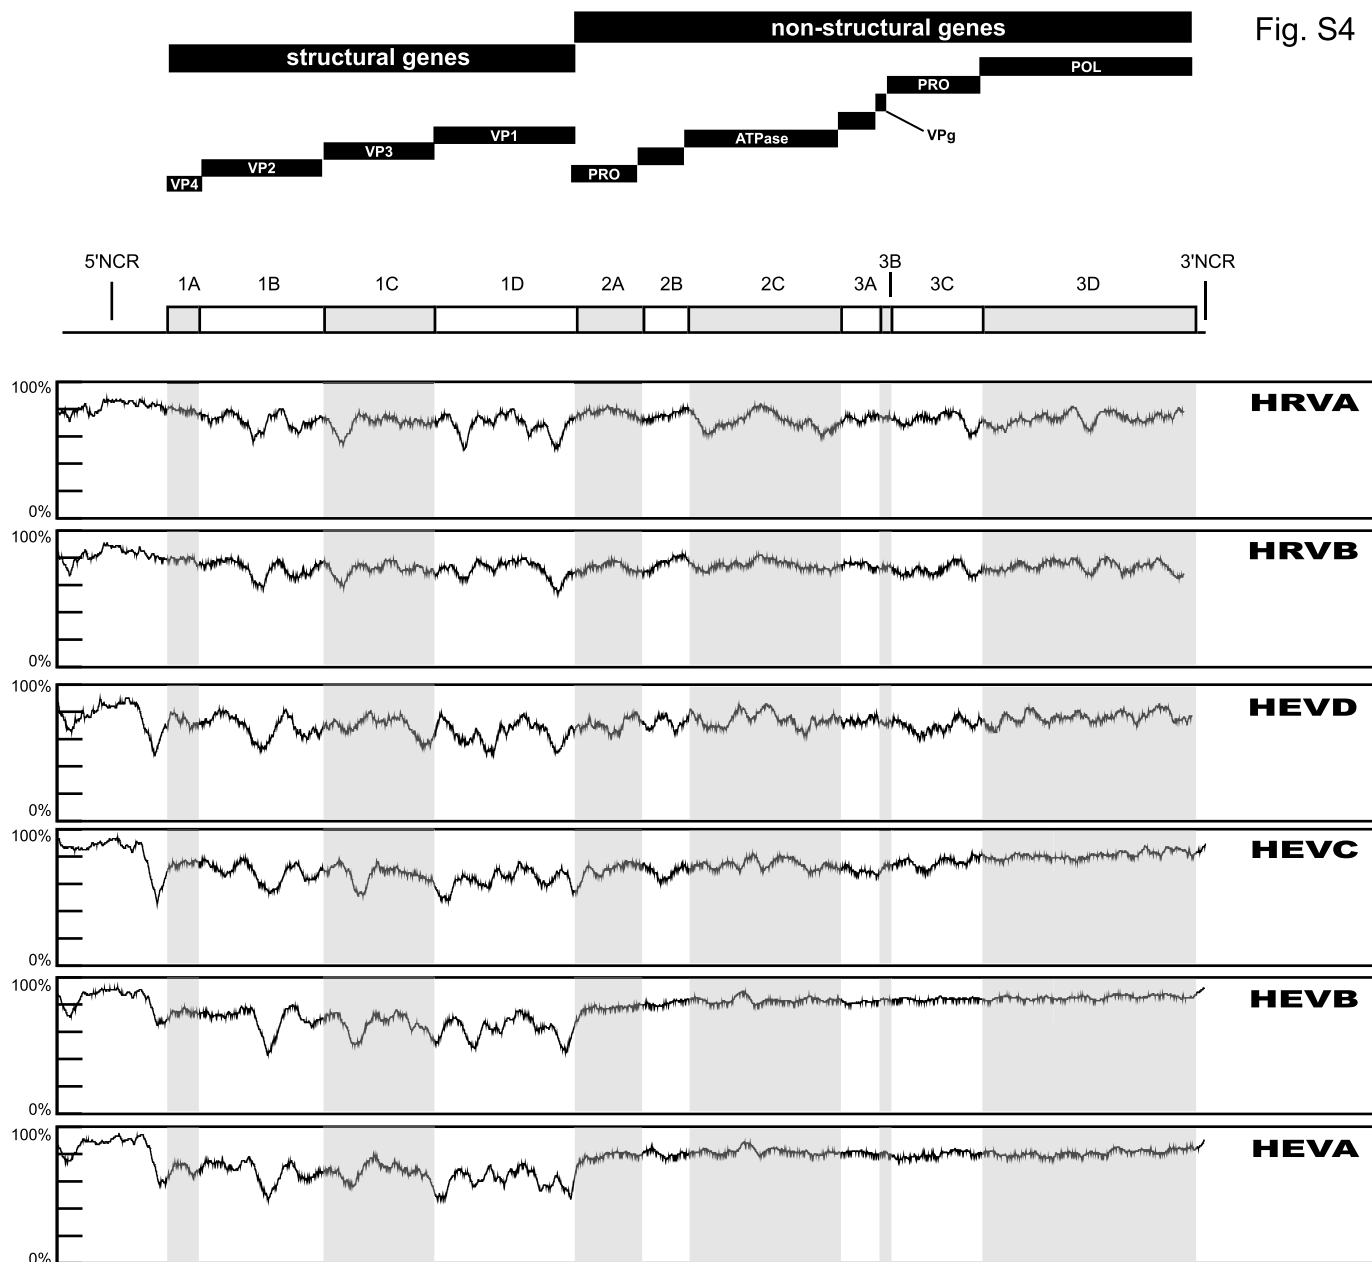

TABLE S1. Potential recombination events between HRV serotypes identified using six automated recombination detection programs\*

| Genomic Locus | Major <sup>A</sup>    | Potential Minors <sup>B</sup> | Predicted By                    |
|---------------|-----------------------|-------------------------------|---------------------------------|
| 212-686       | HRV4                  | HRV3,6,14                     | RDP, GENECONV, Bootscan         |
| 212-686       | HRV46                 | HRV34                         | RDP, GENECONV, Bootscan, SIScan |
| 212-686       | HRV55                 | HRV44,74,28                   | RDP, GENECONV                   |
| 212-686       | HRV74/15 <sup>C</sup> | HRV30,23,2,49                 | RDP, GENECONV, Bootscan         |
| 212-686       | HRV3                  | HRV6                          | RDP, GENECONV                   |
| 1019-1169     | HRV3                  | HRV4                          | RDP, Bootscan                   |
| 2127-2387     | HRV46                 | Unknown <sup>D</sup>          | Bootscan, SIScan                |
| 2127-2387     | HRV34                 | Unknown <sup>D</sup>          | Bootscan, SIScan                |
| 2292-2525     | HRV46                 | Unknown <sup>D</sup>          | GENECONV, SIScan                |
| 3185-3269     | HRV44                 | HRVB <sup>E</sup>             | RDP, SIScan, MaxChi             |

\* RDP, GENECONV, Bootscan, SiScan, MaxChi, and Chimaera implemented in RDP2 (Materials and Methods).

<sup>A</sup> The serotype in which the crossover event was detected.

<sup>B</sup> In no case was it clear which serotype acted as the donor of the crossover sequence. Listed serotypes had the highest similarity to the crossover sequence.

<sup>C</sup> This recombination event is detected in both HRV74 and HRV15, suggesting that it occurred to their most recent common ancestor.

<sup>D</sup> In some cases, the second sequence donor is obviously missing from the dataset.

<sup>E</sup> Although it is not clear which serotype serves as the donor of the crossover sequence in this event, it is clear that the donor is from the HRVB subgroup.
